# Supplementary material
Source: publisher figshare collection journal article supplement (https://acs.figshare.com/ndownloader/files/4488556)
Supplement: Supplementary file 1 [file 4488556]

# Copper(II)/Copper(I)-catalyzed Aza-Michael addition/Click Reaction of in Situ Generated $\alpha$ -Azidohydrazones: Synthesis of Novel Pyrazolone-Triazole Framework

Orazio A. Attanasi, Gianfranco Favi,\* Paolino Filippone, Fabio Mantellini, Giada Moscatelli, and Francesca R. Perrulli

*Istituto di Chimica Organica, Università degli Studi di Urbino "Carlo Bo", Via I Maggetti 24, 61029 Urbino (PU), Italy*

*Fax: (+39)-0722-303441; e-mail: gianfranco.favi@uniurb.it*

## SUPPORTING INFORMATION

### Table of Contents

|    |                                                                                                           |         |
|----|-----------------------------------------------------------------------------------------------------------|---------|
| 1. | General remarks                                                                                           | S2      |
| 2. | Experimental procedures and spectral data                                                                 | S2-S10  |
|    | <i>Synthesis of <math>\alpha</math>-triazolehydrazones <b>3a–n</b> (and <b>3a'–d'</b>, <b>3h'–n'</b>)</i> | S2      |
|    | <i>Characterization data of products <b>3a–n</b> (and <b>3a'–d'</b>, <b>3h'–n'</b>)</i>                   | S3-S7   |
|    | <i>Synthesis of 1-(3-oxo-2,3-dihydro-1H-pyrazol-4-yl)-1,2,3-triazoles <b>4a–k</b></i>                     | S7      |
|    | <i>Characterization data of products <b>4a–k</b></i>                                                      | S7-S10  |
| 3. | $^1\text{H}$ and $^{13}\text{C}$ NMR spectra of products                                                  | S10-S29 |
| 4. | References and notes                                                                                      | S30     |

## Experimental Section

### 1. General Remarks.

All reactions requiring anhydrous conditions were carried out using oven-dried glassware. All the commercially available reagents and solvents were used without further purification. 1,2-Diaza-1,3-dienes (DDs) **1a–g** were synthesized as a mixture of *E/Z* isomers as previously reported<sup>1,2</sup>.

Chromatographic purification of compounds was carried out on silica gel (60–200  $\mu\text{m}$ ). TLC analysis was performed on pre-loaded (0.25 mm) glass supported silica gel plates (Kieselgel 60); compounds were visualized by exposure to UV light and by dipping the plates in 1%  $\text{Ce}(\text{SO}_4)_4 \cdot 4\text{H}_2\text{O}$ , 2.5%  $(\text{NH}_4)_6\text{Mo}_7\text{O}_{24} \cdot 4\text{H}_2\text{O}$  in 10% sulphuric acid followed by heating on a hot plate. All  $^1\text{H}$  NMR and  $^{13}\text{C}$  NMR spectra were recorded at 400 and 100.56 MHz, respectively. Proton and carbon spectra were referenced internally to solvent signals, using values of  $\delta = 2.49$  ppm for proton (middle peak) and  $\delta = 39.50$  ppm for carbon (middle peak) in  $\text{DMSO}-d_6$  and  $\delta = 7.26$  ppm for proton and  $\delta = 77.00$  ppm for carbon (middle peak) in  $\text{CDCl}_3$ . The following abbreviations are used to describe peak patterns where appropriate: s = singlet, d = doublet, t = triplet, q = quartet, m = multiplet and br = broad signal. All coupling constants (*J*) are given in Hz. FT-IR spectra were obtained as Nujol mulls. Mass spectra were recorded in the EI mode (70 eV). Melting points were determined in open capillary tubes and are uncorrected.

### 2. Experimental procedures and spectral data.

**General procedure for the synthesis of  $\alpha$ -triazolehydrazones **3a–n** (and **3a'–d'**, **3h'–n'**).** To a solution of the DD **1a–g** as a mixture of *E/Z* isomers<sup>1,2</sup> (1.0 mmol) in  $\text{CH}_2\text{Cl}_2$  (5 mL), the  $\text{TMSN}_3$  (1.1 mmol) and  $\text{Cu}(\text{OAc})_2 \cdot \text{H}_2\text{O}$  (0.2 mmol) were added. The reaction was allowed under magnetic stirring at room temperature for 15 min, until the disappearance of the DD (monitored by TLC). Then, the alkyne **2a–h** (1 mmol for **1a–d** or 0.5 mmol for **1e–g**), sodium ascorbate (0.4 mmol) and  $\text{H}_2\text{O}$  (5 drops) were added. The reaction mixture was allowed under magnetic stirring at room temperature for 0.6–5 h, until the disappearance of the  $\alpha$ -azidohydrazone intermediate (monitored by TLC). The crude was washed with  $\text{H}_2\text{O}$  (3x10 mL) and dried over anhydrous  $\text{Na}_2\text{SO}_4$ . The organic phase was then filtered and concentrated under reduced pressure. The products **3a–n** (and **3a'–d'**, **h'–n'**) were purified by column chromatography on silica gel (elution mixture: ethyl acetate/cyclohexane). During the course of the reactions, the following work-up, and the long standing, compounds **3a'–d'**, **h'–n'** give rise to a partial (or total) transformation to the relevant **3a–d**.

**Attention:** The main concern about this one-pot procedure may appear a serious safety issue. In fact it is well documented in the literature that ionic azides react with dichloromethane to form explosive azido-chloromethane and/or diazidomethane. See: (a) Conrow, R. E.; Dean, W. D. *Org. Process Res. Dev.* **2008**, *12*, 1285–1286. (b) Hassner, A.; Stern, M.; Gottlieb, H. E. *J. Org. Chem.* **1990**, *55*, 2304–2306. Luckily, under our reaction conditions (short reaction times, stoichiometric amount of TMSN<sub>3</sub>) the possible competing nucleophilic substitution on CH<sub>2</sub>Cl<sub>2</sub> is effectively suppressed since the Michael addition is the favourite and exclusive pathway.

**Caution:** organic azides are potentially explosive compounds (when dry) and should be handled with great care. During our studies we used TMSN<sub>3</sub> and we encountered no problem.

***tert*-Butyl 3-[(aminocarbonyl)hydrazono]-2-(4-phenyl-1*H*-1,2,3-triazol-1-yl)butanoate (3a):**

$\alpha$ -Triazolehydrazone **3a** was isolated by column chromatography (ethyl acetate) in 56% yield as a mixture of desilylated (**a**) and silylated (**a'**) compounds in 53:47 ratio (determined by <sup>1</sup>H NMR). Pale yellow foam. For clarity sake the NMR values are given separately for each compound. Major component **a**: <sup>1</sup>H NMR (400 MHz, DMSO-*d*<sub>6</sub>, 25 °C):  $\delta$  = 1.43 (s, 9H), 1.91 (s, 3H), 6.25 (brs, 2H), 6.26 (s, 1H), 7.30–7.34 (m, 1H), 7.39–7.45 (m, 2H), 7.89–7.92 (m, 2H), 8.69 (s, 1H), 9.59 (brs, 1H); minor component **a'**: <sup>1</sup>H NMR (400 MHz, DMSO-*d*<sub>6</sub>, 25 °C):  $\delta$  = 0.14 (s, 9H), 1.44 (s, 9H), 1.90 (s, 3H), 5.72 (brs, 1H), 6.33 (s, 1H), 7.30–7.34 (m, 1H), 7.39–7.45 (m, 2H), 7.89–7.92 (m, 2H), 8.66 (s, 1H), 9.81 (brs, 1H).

**Ethyl 3-[(aminocarbonyl)hydrazono]-2-(4-phenyl-1*H*-1,2,3-triazol-1-yl)butanoate (3b):**

$\alpha$ -Triazolehydrazone **3b** was isolated by column chromatography (ethyl acetate) in 53% yield as a mixture of desilylated (**b**) and silylated (**b'**) compounds in 49:51 ratio (determined by <sup>1</sup>H NMR). Pale yellow foam. For clarity sake the NMR values are given separately for each compound. Minor component **b**: <sup>1</sup>H NMR (400 MHz, DMSO-*d*<sub>6</sub>, 25 °C):  $\delta$  = 1.21 (t, *J* = 7.2 Hz, 3H), 1.91 (s, 3H), 4.22 (q, *J* = 7.2 Hz, 2H), 6.28 (brs, 2H), 6.42 (s, 1H), 7.31–7.35 (m, 1H), 7.42–7.45 (m, 2H), 7.88–7.90 (m, 2H), 8.72 (s, 1H), 9.62 (brs, 1H); major component **b'**: <sup>1</sup>H NMR (400 MHz, DMSO-*d*<sub>6</sub>, 25 °C):  $\delta$  = 0.14 (s, 9H), 1.22 (t, *J* = 7.2 Hz, 3H), 1.90 (s, 3H), 4.23 (q, *J* = 7.2 Hz, 2H), 5.72 (brs, 1H), 6.50 (s, 1H), 7.31–7.35 (m, 1H), 7.42–7.45 (m, 2H), 7.88–7.90 (m, 2H), 8.71 (s, 1H), 9.86 (brs, 1H).

**3-[(Aminocarbonyl)hydrazono]-*N,N*-dimethyl-2-(4-phenyl-1*H*-1,2,3-triazol-1-yl)butanamide (3c):**

$\alpha$ -Triazolehydrazone **3c** was isolated by column chromatography (ethyl acetate) in 41% yield as a mixture of desilylated (**c**) and silylated (**c'**) compounds in 50:50 ratio (determined by <sup>1</sup>H NMR).

Pale yellow foam. For clarity sake the NMR values are given separately for each compound. Component **c**:  $^1\text{H}$  NMR (400 MHz, DMSO- $d_6$ , 25 °C):  $\delta$  = 1.83 (s, 3H), 2.89 (s, 6H), 6.17 (brs, 2H), 6.65 (s, 1H), 7.30–7.33 (m, 1H), 7.40–7.44 (m, 2H), 7.89–7.92 (m, 2H), 8.55 (s, 1H), 9.62 (brs, 1H); component **c'**:  $^1\text{H}$  NMR (400 MHz, DMSO- $d_6$ , 25 °C):  $\delta$  = 0.12 (s, 9H), 1.82 (s, 3H), 2.96 (s, 3H), 2.97 (s, 3H), 6.74 (s, 1H), 7.29–7.33 (m, 1H), 7.40–7.44 (m, 2H), 7.89–7.92 (m, 2H), 8.55 (s, 1H), 9.86 (brs, 1H).

**Methyl 3-[(aminocarbonyl)hydrazono]-2-(4-phenyl-1H-1,2,3-triazol-1-yl)pentanoate (3d):**

$\alpha$ -Triazolehydrazone **3d** was isolated by column chromatography (ethyl acetate) in 44% yield as a mixture of desilylated (**d**) and silylated (**d'**) compounds in 46:54 ratio (determined by  $^1\text{H}$  NMR). Pale yellow foam. For clarity sake the NMR values are given separately for each compound. Minor component **d**:  $^1\text{H}$  NMR (400 MHz, DMSO- $d_6$ , 25 °C):  $\delta$  = 0.87 (t,  $J$  = 7.2 Hz, 3H), 2.17–2.30 (m, 1H), 2.45–2.55 (m, 1H), 3.75 (s, 3H), 6.22 (brs, 2H), 6.53 (s, 1H), 7.31–7.34 (m, 1H), 7.41–7.45 (m, 2H), 7.89–7.91 (m, 2H), 8.76 (s, 1H), 9.76 (brs, 1H); major component **d'**:  $^1\text{H}$  NMR (400 MHz, DMSO- $d_6$ , 25 °C):  $\delta$  = 0.15 (s, 9H), 0.87 (t,  $J$  = 7.2 Hz, 3H), 2.17–2.30 (m, 1H), 2.45–2.55 (m, 1H), 3.75 (s, 3H), 5.71 (brs, 1H), 6.59 (s, 1H), 7.31–7.34 (m, 1H), 7.41–7.45 (m, 2H), 7.89–7.91 (m, 2H), 8.73 (s, 1H), 10.03 (brs, 1H).

**2-Methoxyethyl 3-[(anilincarbonyl)hydrazono]-2-(4-phenyl-1H-1,2,3-triazol-1-yl)butanoate (3e):**

$\alpha$ -Triazolehydrazone **3e** was isolated by column chromatography (ethyl acetate/cyclohexane 50:50) in 43% yield. White solid; mp: 151–153 °C;  $^1\text{H}$  NMR (400 MHz, DMSO- $d_6$ , 25 °C):  $\delta$  = 2.00 (s, 3H), 3.19 (s, 3H), 3.56–3.58 (m, 2H), 4.29–4.45 (m, 2H), 6.61 (s, 1H), 6.96–7.00 (m, 1H), 7.22–7.26 (m, 2H), 7.32–7.36 (m, 1H), 7.43–7.47 (m, 4H), 7.90–7.92 (m, 2H), 8.48 (brs, 1H), 8.81 (s, 1H), 10.11 (brs, 1H);  $^{13}\text{C}$  NMR (100 MHz,  $\text{CDCl}_3$ , 25 °C):  $\delta$  = 14.8 (q), 57.9 (q), 65.1 (t), 67.4 (d), 69.4 (t), 118.9 (d), 122.3 (d), 122.6 (d), 125.2 (d), 128.1 (d), 128.7 (d), 128.9 (d), 130.3 (s), 138.5 (s), 141.5 (s), 146.5 (s), 152.8 (s), 166.4 (s); IR (nujol):  $\nu_{\text{max}}$  = 3356, 3205, 3130, 3101, 1765, 1707, 1545  $\text{cm}^{-1}$ ; MS  $m/z$  (%): 436 ( $\text{M}^+$ ) (1), 213 (43), 185 (3), 156 (4), 129 (8), 119 (100); anal. calcd. for  $\text{C}_{22}\text{H}_{24}\text{N}_6\text{O}_4$  (436.46): C 60.54, H 5.54, N 19.25; found: C 60.75, H 5.51, N 19.33.

**Ethyl 3-[(anilincarbonyl)hydrazono]-2-(4-phenyl-1H-1,2,3-triazol-1-yl)butanoate (3f):**

$\alpha$ -Triazolehydrazone **3f** was isolated by column chromatography (ethyl acetate/cyclohexane 50:50) in 44% yield. White solid; mp: 182–184 °C;  $^1\text{H}$  NMR (400 MHz,  $\text{CDCl}_3$ , 25 °C):  $\delta$  = 1.36 (t,  $J$  = 7.2 Hz, 3H), 2.10 (s, 3H), 4.36 (q,  $J$  = 7.2 Hz, 2H), 6.23 (s, 1H), 7.02–7.06 (m, 1H), 7.21–7.26 (m, 2H), 7.34–7.36 (m, 3H), 7.41–7.45 (m, 2H), 7.87–7.89 (m, 2H), 7.95 (brs, 1H), 8.14 (s, 1H), 10.05 (brs, 1H);  $^{13}\text{C}$  NMR (100 MHz,  $\text{CDCl}_3$ , 25 °C):  $\delta$  = 14.1 (q), 14.5 (q), 62.9 (t), 67.9 (d), 119.0 (d), 120.1 (d), 123.6 (d), 125.8 (d), 128.4 (d), 128.9 (d), 129.0 (d), 130.0 (s), 137.4 (s), 141.6 (s), 148.1



(s), 153.7 (s), 165.8 (s); IR (nujol):  $\nu_{\max}$  = 3408, 3200, 3141, 3096, 1754, 1702, 1528  $\text{cm}^{-1}$ ; MS  $m/z$  (%): 406 ( $\text{M}^+$ ) (3), 305 (4), 213 (37), 176 (16), 169 (9), 119 (100); anal. calcd. for  $\text{C}_{21}\text{H}_{22}\text{N}_6\text{O}_3$  (406.44): C 62.06, H 5.46, N 20.68; found: C 62.21, H 5.41, N 20.59.

**Methyl 3-([(3-fluorophenyl)amino]carbonyl)hydrazono)-2-(4-phenyl-1*H*-1,2,3-triazol-1-yl)butanoate (3g):**

$\alpha$ -Triazolehydrazone **3g** was isolated by column chromatography (ethyl acetate/cyclohexane 50:50) in 70% yield. White solid; mp: 214–216 °C;  $^1\text{H}$  NMR (400 MHz,  $\text{DMSO}-d_6$ , 25 °C):  $\delta$  = 2.01 (s, 3H), 3.81 (s, 3H), 6.59 (s, 1H), 6.78–6.83 (m, 1H), 7.17–7.19 (m, 1H), 7.23–7.36 (m, 2H), 7.43–7.51 (m, 3H), 7.89–7.91 (m, 2H), 8.75 (brs, 1H), 8.85 (s, 1H), 10.20 (brs, 1H);  $^{13}\text{C}$  NMR (100 MHz,  $\text{CDCl}_3$ , 25 °C):  $\delta$  = 14.8 (q), 53.3 (q), 67.4 (d), 105.5 (d,  $^2J_{\text{CF}}$  = 26.6 Hz), 108.9 (d,  $^2J_{\text{CF}}$  = 20.4 Hz), 114.7 (d), 122.3 (d), 125.2 (d), 125.5 (d), 128.1 (d), 128.9 (s), 130.2 (d,  $^3J_{\text{CF}}$  = 9.1 Hz), 140.5 (s,  $^3J_{\text{CF}}$  = 10.6 Hz), 142.0 (d), 146.5 (s), 152.7 (s), 161.1 (s), 165.7 (s,  $^1J_{\text{CF}}$  = 208 Hz); IR (nujol):  $\nu_{\max}$  = 3357, 3207, 3098, 1741, 1713, 1546  $\text{cm}^{-1}$ ; MS  $m/z$  (%): 410 ( $\text{M}^+$ ) (8), 323 (20), 300 (9), 213 (57), 194 (34), 169 (21), 137 (100); anal. calcd. for  $\text{C}_{20}\text{H}_{19}\text{N}_6\text{O}_3\text{F}$  (410.40): C 58.53, H 4.67, N 20.48; found: C 58.42, H 4.63, N 20.59.

***tert*-Butyl 3-[(aminocarbonyl)hydrazono]-2-(4-butyl-1*H*-1,2,3-triazol-1-yl)butanoate (3h):**

$\alpha$ -Triazolehydrazone **3h** was isolated by column chromatography (ethyl acetate) in 64% yield as a mixture of desilylated (**h**) and silylated (**h'**) compounds in 62:38 ratio (determined by  $^1\text{H}$  NMR). Pale yellow foam. For clarity sake the NMR values are given separately for each compound. Major component **h**:  $^1\text{H}$  NMR (400 MHz,  $\text{DMSO}-d_6$ , 25 °C):  $\delta$  = 0.87 (t,  $J$  = 7.2 Hz, 3H), 1.24–1.33 (m, 2H), 1.41 (s, 9H), 1.52–1.60 (m, 2H), 1.84 (s, 3H), 2.61 (t,  $J$  = 7.6 Hz, 2H), 6.11 (s, 1H), 6.25 (brs, 2H), 7.88 (s, 1H), 9.55 (brs, 1H); minor component **h'**:  $^1\text{H}$  NMR (400 MHz,  $\text{DMSO}-d_6$ , 25 °C):  $\delta$  = 0.19 (s, 9H), 0.87 (t,  $J$  = 7.2 Hz, 3H), 1.24–1.33 (m, 2H), 1.41 (s, 9H), 1.52–1.60 (m, 2H), 1.83 (s, 3H), 2.61 (t,  $J$  = 7.6 Hz, 2H), 5.72 (brs, 1H), 6.17 (s, 1H), 7.86 (s, 1H), 9.77 (brs, 1H).

***tert*-Butyl 3-[(aminocarbonyl)hydrazono]-2-[4-(hydroxymethyl)-1*H*-1,2,3-triazol-1-yl]butanoate (3i):**

$\alpha$ -Triazolehydrazone **3i** was isolated by column chromatography (ethyl acetate) in 40% yield as a mixture of desilylated (**i**) and silylated (**i'**) compounds in 71:29 ratio (determined by  $^1\text{H}$  NMR). Pale yellow foam. For clarity sake the NMR values are given separately for each compound. Major component **i**:  $^1\text{H}$  NMR (400 MHz,  $\text{DMSO}-d_6$ , 25 °C):  $\delta$  = 1.42 (s, 9H), 1.85 (s, 3H), 4.51 (d,  $J$  = 5.6 Hz, 2H), 5.18 (t,  $J$  = 5.6 Hz, 1H), 6.10 (brs, 2H), 6.16 (s, 1H), 7.98 (s, 1H), 9.54 (brs, 1H); minor component **i'**:  $^1\text{H}$  NMR (400 MHz,  $\text{DMSO}-d_6$ , 25 °C):  $\delta$  = 0.17 (s, 9H), 1.43 (s, 9H), 1.84 (s, 3H), 4.51 (d,  $J$  = 5.6 Hz, 2H), 5.18 (t,  $J$  = 5.6 Hz, 1H), 5.72 (brs, 1H), 6.22 (s, 1H), 7.95 (s, 1H), 9.76 (brs, 1H).

***tert*-Butyl 3-[(aminocarbonyl)hydrazono]-2-[4-(trimethylsilyl)-1*H*-1,2,3-triazol-1-yl]butanoate (3j):**

$\alpha$ -Triazolehydrazone **3j** was isolated by column chromatography (ethyl acetate) in 46% yield as a mixture of desilylated (**j**) and silylated (**j'**) compounds in 68:32 ratio (determined by  $^1\text{H}$  NMR). Pale yellow foam. For clarity sake the NMR values are given separately for each compound. Major component **j**:  $^1\text{H}$  NMR (400 MHz, DMSO- $d_6$ , 25 °C):  $\delta$  = 0.25 (s, 9H), 1.41 (s, 9H), 1.86 (s, 3H), 6.15 (brs, 2H), 6.21 (s, 1H), 8.18 (s, 1H), 9.53 (brs, 1H); minor component **j'**:  $^1\text{H}$  NMR (400 MHz, DMSO- $d_6$ , 25 °C):  $\delta$  = 0.17 (s, 9H), 0.25 (s, 9H), 1.41 (s, 9H), 1.84 (s, 3H), 5.73 (brs, 1H), 6.25 (s, 1H), 8.15 (s, 1H), 9.74 (brs, 1H).

***tert*-Butyl 3-[(aminocarbonyl)hydrazono]-2-[4-(4-methylphenyl)-1*H*-1,2,3-triazol-1-yl]butanoate (3k):**

$\alpha$ -Triazolehydrazone **3k** was isolated by column chromatography (ethyl acetate) in 51% yield as a mixture of desilylated (**k**) and silylated (**k'**) compounds in 59:41 ratio (determined by  $^1\text{H}$  NMR). Pale yellow foam. For clarity sake the NMR values are given separately for each compound. Major component **k**:  $^1\text{H}$  NMR (400 MHz, DMSO- $d_6$ , 25 °C):  $\delta$  = 1.43 (s, 9H), 1.90 (s, 3H), 2.31 (s, 3H), 6.20 (brs, 2H), 6.24 (s, 1H), 7.23 (d,  $J$  = 8 Hz, 2H), 7.78 (d,  $J$  = 8 Hz, 2H), 8.62 (s, 1H), 9.60 (brs, 1H); minor component **k'**:  $^1\text{H}$  NMR (400 MHz, DMSO- $d_6$ , 25 °C):  $\delta$  = 0.14 (s, 9H), 1.43 (s, 9H), 1.88 (s, 3H), 2.31 (s, 3H), 5.73 (brs, 1H), 6.30 (s, 1H), 7.23 (d,  $J$  = 8 Hz, 2H), 7.78 (d,  $J$  = 8 Hz, 2H), 8.59 (s, 1H), 9.81 (brs, 1H).

***tert*-Butyl 3-[(aminocarbonyl)hydrazono]-2-[4-(4-methoxyphenyl)-1*H*-1,2,3-triazol-1-yl]butanoate (3l):**

$\alpha$ -Triazolehydrazone **3l** was isolated by column chromatography (ethyl acetate) in 57% yield as a mixture of desilylated (**l**) and silylated (**l'**) compounds in 81:19 ratio (determined by  $^1\text{H}$  NMR). Pale yellow foam. For clarity sake the NMR values are given separately for each compound. Major component **l**:  $^1\text{H}$  NMR (400 MHz, DMSO- $d_6$ , 25 °C):  $\delta$  = 1.43 (s, 9H), 1.90 (s, 3H), 3.77 (s, 3H), 6.20 (brs, 2H), 6.23 (s, 1H), 6.99 (d,  $J$  = 8.8 Hz, 2H), 7.82 (d,  $J$  = 8.8 Hz, 2H), 8.56 (s, 1H), 9.58 (brs, 1H); minor component **l'**:  $^1\text{H}$  NMR (400 MHz, DMSO- $d_6$ , 25 °C):  $\delta$  = 0.15 (s, 9H), 1.43 (s, 9H), 1.89 (s, 3H), 3.77 (s, 3H), 5.73 (brs, 1H), 6.29 (s, 1H), 6.99 (d,  $J$  = 8.8 Hz, 2H), 7.82 (d,  $J$  = 8.8 Hz, 2H), 8.53 (s, 1H), 9.80 (brs, 1H).

**Ethyl 1-[2-[(aminocarbonyl)hydrazono]-1-(*tert*-butoxycarbonyl)propyl]-1*H*-1,2,3-triazole-4-carboxylate (3m):**

$\alpha$ -Triazolehydrazone **3m** was isolated by column chromatography (ethyl acetate) in 39% yield as a mixture of desilylated (**m**) and silylated (**m'**) compounds in 65:35 ratio (determined by  $^1\text{H}$  NMR). Pale yellow foam. For clarity sake the NMR values are given separately for each compound. Major component **m**:  $^1\text{H}$  NMR (400 MHz, DMSO- $d_6$ , 25 °C):  $\delta$  = 1.29 (t,  $J$  = 7.2 Hz, 3H), 1.42 (s, 9H),

1.90 (s, 3H), 4.30 (q,  $J = 7.2$  Hz, 2H), 6.25 (brs, 2H), 6.31 (s, 1H), 8.85 (s, 1H), 9.56 (brs, 1H); minor component **m'**:  $^1\text{H}$  NMR (400 MHz, DMSO- $d_6$ , 25 °C):  $\delta = 0.15$  (s, 9H), 1.29 (t,  $J = 7.2$  Hz, 3H), 1.42 (s, 9H), 1.89 (s, 3H), 4.30 (q,  $J = 7.2$  Hz, 2H), 5.68 (brs, 1H), 6.38 (s, 1H), 8.83 (s, 1H), 9.78 (brs, 1H).

***tert*-Butyl 2-(4-acetyl-1*H*-1,2,3-triazol-1-yl)-3-[(aminocarbonyl)hydrazono]butanoate (**3n**):**

$\alpha$ -Triazolehydrazone **3n** was isolated by column chromatography (ethyl acetate) in 50% yield as a mixture of desilylated (**n**) and silylated (**n'**) compounds in 78:22 ratio (determined by  $^1\text{H}$  NMR). Pale yellow foam. For clarity sake the NMR values are given separately for each compound. Major component **n**:  $^1\text{H}$  NMR (400 MHz, DMSO- $d_6$ , 25 °C):  $\delta = 1.42$  (s, 9H), 1.90 (s, 3H), 2.55 (s, 3H), 6.25 (brs, 2H), 6.32 (s, 1H), 8.86 (s, 1H), 9.55 (brs, 1H); minor component **n'**:  $^1\text{H}$  NMR (400 MHz, DMSO- $d_6$ , 25 °C):  $\delta = 0.16$  (s, 9H), 1.42 (s, 9H), 1.89 (s, 3H), 2.55 (s, 3H), 5.69 (brs, 1H), 6.38 (s, 1H), 8.82 (s, 1H), 9.77 (brs, 1H).

**General procedure for the synthesis of 1-(3-oxo-2,3-dihydro-1*H*-pyrazol-4-yl)-1,2,3-triazoles **4a–k**.** The  $\alpha$ -triazolehydrazone **3a–n** and **3a'–d, h'–n'** (1 mmol) was dissolved in methanol (5 mL) and a stoichiometric amount of the potassium carbonate (1 mmol) was added. The reaction mixture was magnetically stirred for 0.1–2 h (see Table 3) until the disappearance of the starting material (monitored by TLC). The solvent was then evaporated under reduced pressure. The products **4a–k** were obtained by elution with methanol of the crude mixture on acidic resin column (cation–exchange resin [Dowex HCRS(E)] from Dow Chemicals, USA, treated with HCl 1M) and crystallized from methanol. In the case of pyrazolone-triazole **4j** the acidic treatment with cation–exchange resin was avoided to prevent the formation of byproducts.

**1-[2-(Aminocarbonyl)-5-methyl-3-oxo-2,3-dihydro-1*H*-pyrazol-4-yl]-4-phenyl-1*H*-1,2,3-**

**triazole (**4a**):** White solid from methanol; mp: 226–228 °C;  $^1\text{H}$  NMR (400 MHz, DMSO- $d_6$ , 25 °C):  $\delta = 2.27$  (s, 3H), 7.33–7.36 (m, 1H), 7.44–7.47 (m, 2H), 7.89–7.91 (m, 2H), 8.07 (brs, 1H) and 8.14 (brs, 1H), 8.77 (s, 1H), 13.48 (brs, 1H);  $^{13}\text{C}$  NMR (100 MHz, DMSO- $d_6$ , 25 °C):  $\delta = 10.3$  (q), 103.3 (s), 122.8 (d), 125.3 (d), 128.0 (d), 128.9 (d), 130.3 (s), 144.3 (s), 146.0 (s), 148.6 (s), 156.0 (s); IR (nujol):  $\nu_{\text{max}} = 3315, 1751, 1680, 1597, 1360\text{ cm}^{-1}$ ; MS  $m/z$  (%): 285 ( $\text{M}^+ + 1$ ) (1), 241 (2), 213 (100), 207 (5), 185 (7), 156 (9), 129 (17), 117 (15), 102 (45); anal. calcd. for  $\text{C}_{13}\text{H}_{12}\text{N}_6\text{O}_2$  (284.27): C 54.93, H 4.25, N 29.56; found: C 55.15, H 4.33, N 29.44.

**1-[2-(Aminocarbonyl)-5-ethyl-3-oxo-2,3-dihydro-1*H*-pyrazol-4-yl]-4-phenyl-1*H*-1,2,3-triazole**

**(**4b**):** White solid from methanol; mp: 221–223 °C;  $^1\text{H}$  NMR (400 MHz, DMSO- $d_6$ , 25 °C):  $\delta = 1.08$  (t,  $J = 7.6$  Hz, 3H), 2.60 (q,  $J = 7.6$  Hz, 2H), 7.32–7.36 (m, 1H), 7.43–7.47 (m, 2H), 7.89–7.91 (m, 2H), 8.09 (brs, 1H) and 8.14 (brs, 1H), 8.78 (s, 1H), 13.47 (brs, 1H);  $^{13}\text{C}$  NMR (100 MHz,

DMSO-*d*<sub>6</sub>, 25 °C):  $\delta$  = 12.4 (q), 18.1 (t), 102.6 (s), 123.3 (d), 125.3 (d), 128.1 (d), 129.0 (d), 130.3 (s), 146.1 (s), 148.6 (s), 149.4 (s), 156.3 (s); IR (nujol):  $\nu_{\max}$  = 3376, 3323, 3129, 1719, 1672, 1589, 1372 cm<sup>-1</sup>; MS *m/z* (%): 299 (M<sup>+</sup>+1) (1), 252 (3), 227 (100), 226 (21), 212 (16), 198 (9), 155 (11), 130 (21), 102 (44). anal. calcd. for C<sub>14</sub>H<sub>14</sub>N<sub>6</sub>O<sub>2</sub> (298.30): C 56.37, H 4.73, N 28.17; found: C 56.25, H 4.76, N 27.96.

**1-[2-(Anilinocarbonyl)-5-methyl-3-oxo-2,3-dihydro-1H-pyrazol-4-yl]-4-phenyl-1H-1,2,3-triazole (4c):** White solid from methanol; mp: 152–154 °C; <sup>1</sup>H NMR (400 MHz, DMSO-*d*<sub>6</sub>, 25 °C):  $\delta$  = 2.33 (s, 3H), 7.13–7.17 (m, 1H), 7.33–7.48 (m, 5H), 7.54–7.56 (m, 2H), 7.91–7.93 (m, 2H), 8.81 (s, 1H), 11.01 (brs, 1H), 13.79 (brs, 1H); <sup>13</sup>C NMR (100 MHz, DMSO-*d*<sub>6</sub>, 25 °C):  $\delta$  = 10.5 (q), 103.3 (s), 119.8 (d), 122.7 (d), 124.4 (d), 125.3 (d), 128.1 (d), 129.0 (d), 129.3 (d), 130.3 (s), 136.7 (s), 145.1 (s), 145.9 (s), 146.1 (s), 156.2 (s); IR (nujol):  $\nu_{\max}$  = 3153, 1713, 1613, 1572 cm<sup>-1</sup>; MS *m/z* (%): 241 (3), 213 (95), 185 (6), 156 (8), 130 (15), 119 (100), 102 (43); anal. calcd. for C<sub>19</sub>H<sub>16</sub>N<sub>6</sub>O<sub>2</sub> (360.37): C 63.32, H 4.48, N 23.32; found: C 63.43, H 4.50, N 23.16.

**1-{2-[(3-Fluorophenyl)aminocarbonyl]-5-methyl-3-oxo-2,3-dihydro-1H-pyrazol-4-yl}-4-phenyl-1H-1,2,3-triazole (4d):** White solid from methanol; mp: 227–229 °C; <sup>1</sup>H NMR (400 MHz, DMSO-*d*<sub>6</sub>, 25 °C):  $\delta$  = 2.33 (s, 3H), 6.96–7.00 (m, 1H), 7.28–7.57 (m, 6H), 7.90–7.92 (m, 2H), 8.80 (s, 1H), 11.16 (brs, 1H), 13.38 (brs, 1H); <sup>13</sup>C NMR (100 MHz, DMSO-*d*<sub>6</sub>, 25 °C):  $\delta$  = 10.6 (q), 103.1 (s), 106.7 (d, <sup>2</sup>*J*<sub>CF</sub> = 26.6 Hz), 110.9 (d, <sup>2</sup>*J*<sub>CF</sub> = 21.9 Hz), 115.7 (d), 122.6 (d), 125.3 (d), 128.1 (d), 129.0 (d), 130.3 (s), 130.9 (d, <sup>3</sup>*J*<sub>CF</sub> = 9.1 Hz), 138.5 (s, <sup>3</sup>*J*<sub>CF</sub> = 11.0 Hz), 145.5 (s), 146.0 (s), 146.1 (s), 156.2 (s), 162.3 (s, <sup>1</sup>*J*<sub>CF</sub> = 241 Hz); IR (nujol):  $\nu_{\max}$  = 3194, 3159, 1725, 1621, 1574 cm<sup>-1</sup>; MS *m/z* (%): 252 (3), 213 (33), 179 (3), 137 (100), 117 (6), 109 (52); anal. calcd. for C<sub>19</sub>H<sub>15</sub>N<sub>6</sub>O<sub>2</sub>F (378.36): C 60.31, H 4.00, N 22.21; found: C 60.24, H 4.03, N 22.16.

**1-[2-(Aminocarbonyl)-5-methyl-3-oxo-2,3-dihydro-1H-pyrazol-4-yl]-4-butyl-1H-1,2,3-triazole (4e):** White solid from methanol; mp: 169–171 °C; <sup>1</sup>H NMR (400 MHz, DMSO-*d*<sub>6</sub>, 25 °C):  $\delta$  = 0.89 (t, *J* = 7.6 Hz, 3H), 1.28–1.37 (m, 2H), 1.56–1.63 (m, 2H), 2.21 (s, 3H), 2.65 (t, *J* = 7.6 Hz, 2H), 8.03 (s, 1H), 8.13 (brs, 2H), 13.34 (brs, 1H); <sup>13</sup>C NMR (100 MHz, DMSO-*d*<sub>6</sub>, 25 °C):  $\delta$  = 10.4 (q), 13.7 (q), 21.7 (t), 24.6 (t), 31.0 (t), 103.5 (s), 123.0 (d), 144.0 (s), 146.5 (s), 148.6 (s), 156.0 (s); IR (nujol):  $\nu_{\max}$  = 3326, 3164, 1775, 1679, 1600, 1355 cm<sup>-1</sup>; MS *m/z* (%): 264 (M<sup>+</sup>) (2), 213 (15), 192 (13), 178 (12), 164 (10), 150 (100), 137 (18), 124 (13), 112 (21); anal. calcd. for C<sub>11</sub>H<sub>16</sub>N<sub>6</sub>O<sub>2</sub> (264.28): C 49.99, H 6.10, N 31.80; found: C 55.28, H 6.04, N 31.62.

**1-[2-(Aminocarbonyl)-5-methyl-3-oxo-2,3-dihydro-1H-pyrazol-4-yl]-4-hydroxymethyl-1H-1,2,3-triazole (4f):** White solid from methanol; mp: 188–190 °C; <sup>1</sup>H NMR (400 MHz, DMSO-*d*<sub>6</sub>, 25 °C):  $\delta$  = 2.23 (s, 3H), 4.50 (brs, 1H), 4.56 (s, 2H), 8.05 (brs, 1H) and 8.11 (brs, 1H), 8.14 (s, 1H), 13.36 (brs, 1H); <sup>13</sup>C NMR (100 MHz, DMSO-*d*<sub>6</sub>, 25 °C):  $\delta$  = 10.8 (q), 54.9 (t), 102.7 (s), 123.8 (d),

144.0 (s), 147.5 (s), 149.2 (s), 156.3 (s); IR (nujol):  $\nu_{\max}$  = 3344, 3222, 1773, 1681, 1593  $\text{cm}^{-1}$ ; MS  $m/z$  (%): 239 ( $M^+ + 1$ ) (1), 213 (18), 207 (13), 195 (8), 166 (10), 149 (100), 129 (20), 124 (21), 111 (29); anal. calcd. for  $\text{C}_8\text{H}_{10}\text{N}_6\text{O}_3$  (238.20): C 40.34, H 4.23, N 35.28; found: C 40.20, H 4.28, N 35.40.

**1-[2-(Aminocarbonyl)-5-methyl-3-oxo-2,3-dihydro-1H-pyrazol-4-yl]-4-trimethylsilyl-1H-1,2,3-triazole (4g):** White solid from methanol; mp: 150–152 °C;  $^1\text{H}$  NMR (400 MHz,  $\text{DMSO}-d_6$ , 25 °C):  $\delta$  = 0.28 (s, 9H), 2.21 (s, 3H), 8.06 (brs, 1H) and 8.12 (brs, 1H), 8.31 (s, 1H), 13.40 (brs, 1H);  $^{13}\text{C}$  NMR (100 MHz,  $\text{DMSO}-d_6$ , 25 °C):  $\delta$  = -1.0 (q), 10.4 (q), 103.2 (s), 131.6 (d), 144.0 (s), 144.5 (s), 148.6 (s), 156.0 (s); IR (nujol):  $\nu_{\max}$  = 3300, 3233, 3149, 1733, 1599, 1383, 1358  $\text{cm}^{-1}$ ; MS  $m/z$  (%): 281 ( $M^+ + 1$ ) (1), 266 (3), 209 (31), 194 (100), 167 (25), 154 (7), 141 (19), 125 (10), 100 (70); anal. calcd. for  $\text{C}_{10}\text{H}_{16}\text{N}_6\text{O}_2\text{Si}$  (280.36): C 42.84, H 5.75, N 29.98; found: C 42.95, H 5.68, N 29.83.

**1-[2-(Aminocarbonyl)-5-methyl-3-oxo-2,3-dihydro-1H-pyrazol-4-yl]-4-(4-methylphenyl)-1H-1,2,3-triazole (4h):** White solid from methanol; mp: 241–243 °C;  $^1\text{H}$  NMR (400 MHz,  $\text{DMSO}-d_6$ , 25 °C):  $\delta$  = 2.25 (s, 3H), 2.32 (s, 3H), 7.26 (d,  $J$  = 7.6 Hz, 2H), 7.78 (d,  $J$  = 7.6 Hz, 2H), 8.09 (brs, 1H) and 8.13 (brs, 1H), 8.70 (s, 1H), 13.51 (brs, 1H);  $^{13}\text{C}$  NMR (100 MHz,  $\text{DMSO}-d_6$ , 25 °C):  $\delta$  = 10.5 (q), 20.9 (q), 102.8 (s), 122.2 (d), 125.3 (d), 127.7 (d), 129.5 (s), 137.3 (s), 144.2 (s), 146.0 (s), 149.0 (s), 156.2 (s); IR (nujol):  $\nu_{\max}$  = 3346, 3213, 1718, 1660, 1578, 1395  $\text{cm}^{-1}$ ; MS  $m/z$  (%): 252 (3), 227 (100), 222 (15), 179 (23), 166 (10), 138 (46), 115 (43); anal. calcd. for  $\text{C}_{14}\text{H}_{14}\text{N}_6\text{O}_2$  (298.30): C 56.37, H 4.73, N 28.17; found: C 56.51, H 4.68, N 28.11.

**1-[2-(Aminocarbonyl)-5-methyl-3-oxo-2,3-dihydro-1H-pyrazol-4-yl]-4-(4-methoxyphenyl)-1H-1,2,3-triazole (4i):** White solid from methanol; mp: 201–203 °C;  $^1\text{H}$  NMR (400 MHz,  $\text{DMSO}-d_6$ , 25 °C):  $\delta$  = 2.26 (s, 3H), 3.78 (s, 3H), 7.01 (d,  $J$  = 8.4 Hz, 2H), 7.82 (d,  $J$  = 8.4 Hz, 2H), 8.08 (brs, 1H) and 8.14 (brs, 1H), 8.65 (s, 1H), 13.46 (brs, 1H);  $^{13}\text{C}$  NMR (100 MHz,  $\text{DMSO}-d_6$ , 25 °C):  $\delta$  = 10.3 (q), 55.2 (q), 103.4 (s), 114.4 (d), 121.8 (d), 122.9 (d), 126.6 (s), 144.2 (s), 146.0 (s), 148.6 (s), 156.0 (s), 159.1 (s); IR (nujol):  $\nu_{\max}$  = 3353, 3149, 1721, 1675, 1579, 1392, 1242  $\text{cm}^{-1}$ ; MS  $m/z$  (%): 306 (7), 285 (11), 243 (73), 228 (65), 207 (26), 135 (98), 119 (100), 104 (74). anal. calcd. for  $\text{C}_{14}\text{H}_{14}\text{N}_6\text{O}_3$  (314.30): C 53.50, H 4.49, N 26.74; found: C 53.41, H 4.53, N 26.68.

**Ethyl 1-[2-(aminocarbonyl)-5-methyl-3-oxo-2,3-dihydro-1H-pyrazol-4-yl]-2,3-dihydro-1H-1,2,3-triazole-4-carboxylate (4j):** White solid from methanol; mp: 230–232 °C;  $^1\text{H}$  NMR (400 MHz,  $\text{DMSO}-d_6$ , 25 °C):  $\delta$  = 1.29 (t,  $J$  = 7.2 Hz, 3H), 2.09 (s, 3H), 4.28 (q,  $J$  = 7.2 Hz, 2H), 6.85 (brs, 1H), 8.75 (s, 1H), 9.03 (brs, 1H), 13.22 (brs, 1H);  $^{13}\text{C}$  NMR (100 MHz,  $\text{DMSO}-d_6$ , 25 °C):  $\delta$  = 14.0 (q), 14.2 (q), 60.3 (q), 97.4 (s), 126.5 (d), 137.4 (s), 142.8 (s), 152.5 (s), 157.9 (s), 160.5 (s); IR (nujol):  $\nu_{\max}$  = 3343, 3129, 1703, 1652, 1591  $\text{cm}^{-1}$ ; MS  $m/z$  (%): 279 (10), 263 (9), 236 (12), 219

(84), 203 (38), 189 (35), 161 (30), 149 (82), 139 (34), 125 (66), 111 (100). anal. calcd. for  $C_{10}H_{12}N_6O_4$  (280.24): C 42.86, H 4.32, N 29.99; found: C 42.63, H 4.19, N 30.13.

**1-[2-(Aminocarbonyl)-5-methyl-3-oxo-2,3-dihydro-1H-pyrazol-4-yl]-4-acetyl-1H-1,2,3-triazole (4k):** White solid from methanol; mp: 132 °C burn;  $^1H$  NMR (400 MHz, DMSO- $d_6$ , 25 °C):  $\delta$  = 2.25 (s, 3H), 2.58 (s, 3H), 8.08 (brs, 2H), 8.91 (s, 1H), 13.62 (brs, 1H);  $^{13}C$  NMR (100 MHz, DMSO- $d_6$ , 25 °C):  $\delta$  = 10.3 (q), 27.3 (q), 102.6 (s), 128.4 (d), 144.2 (s), 146.6 (s), 148.4 (s), 155.7 (s), 191.3 (s); IR (nujol):  $\nu_{max}$  = 3390, 3327, 3096, 1748, 1689, 1589, 1354  $cm^{-1}$ ; MS  $m/z$  (%): 250 ( $M^+$ ) (8), 235 (4), 219 (2), 207 (15), 179 (100), 164 (53), 136 (56), 108 (28); anal. calcd. for  $C_9H_{10}N_6O_3$  (250.21): C 43.20, H 4.03, N 33.59; found: C 43.31, H 4.07, N 33.48.

### 3. $^1H$ and $^{13}C$ NMR spectra of products.

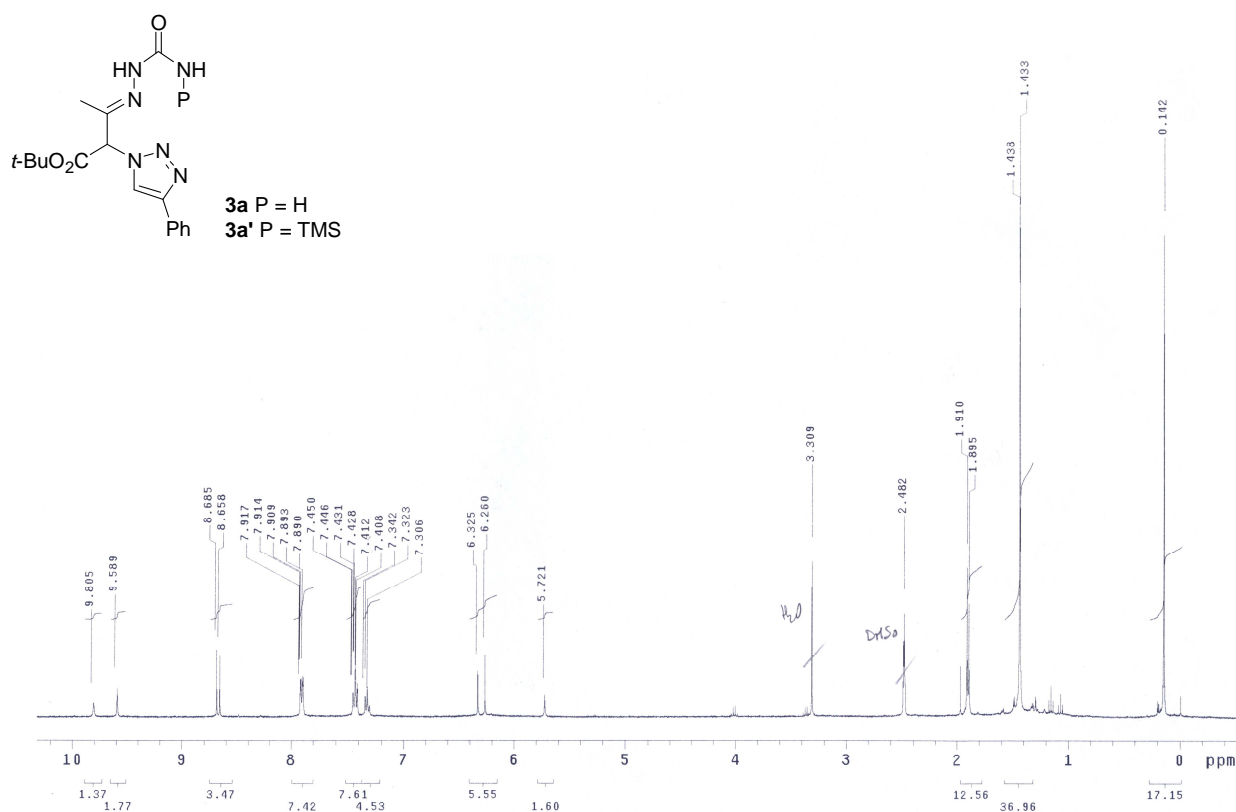

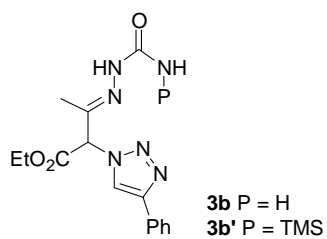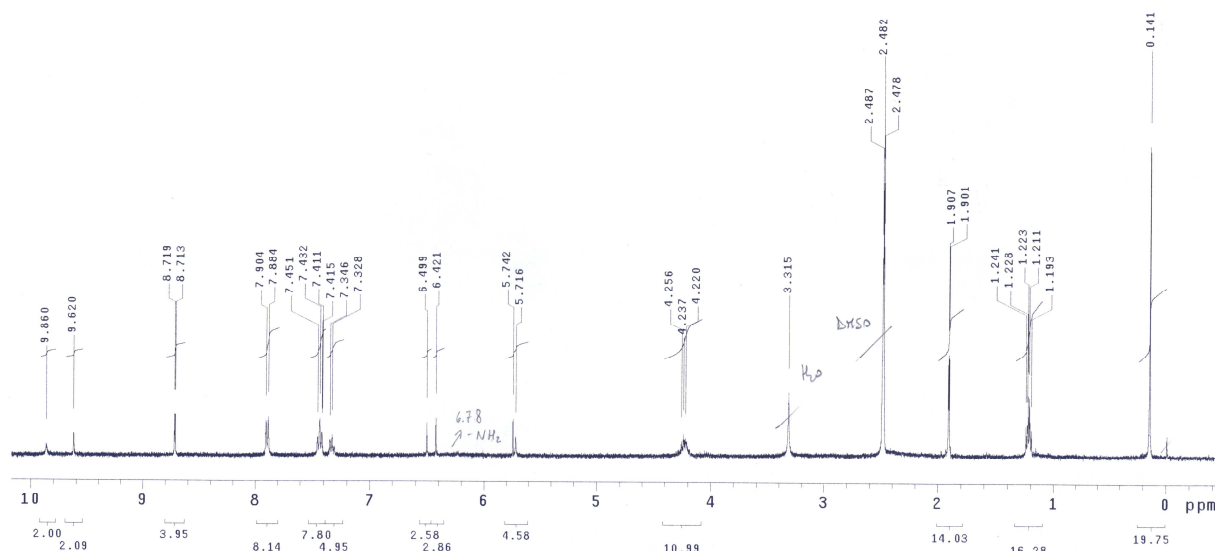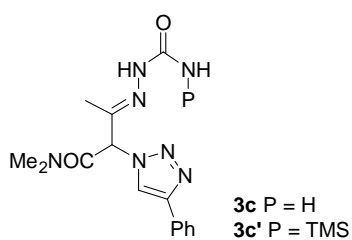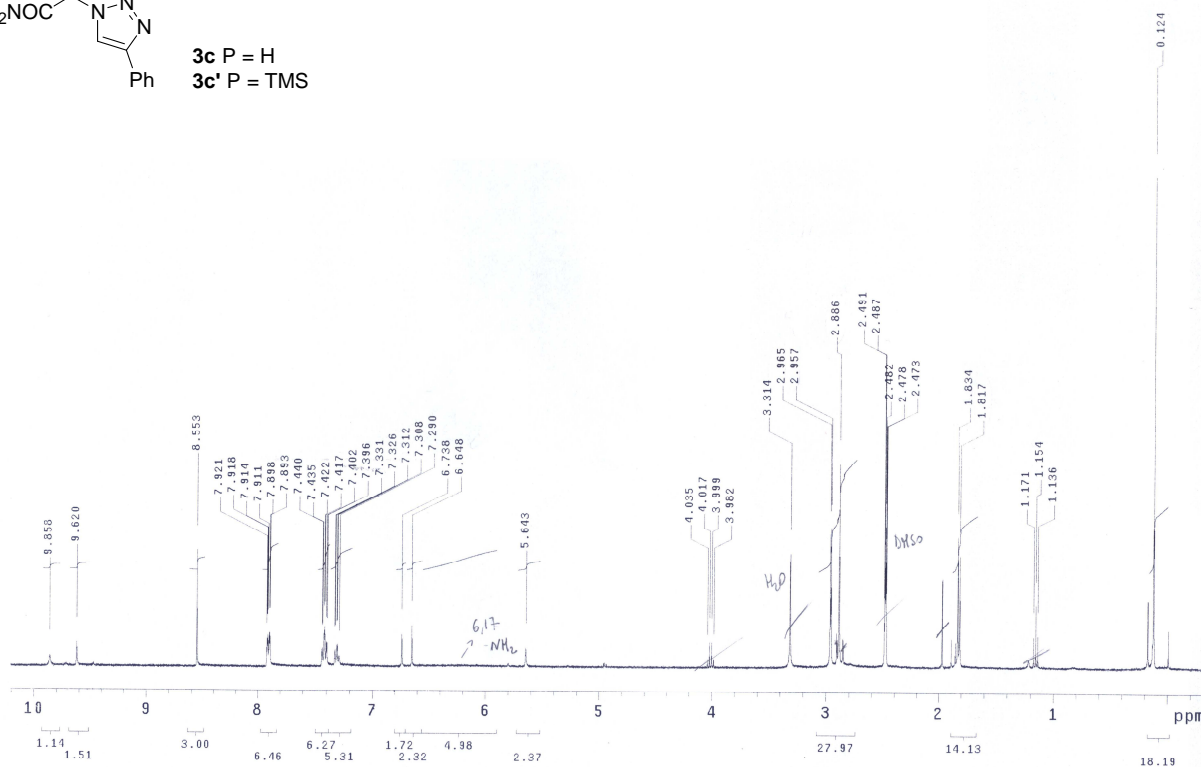

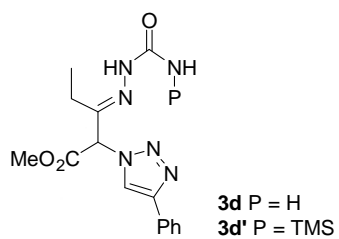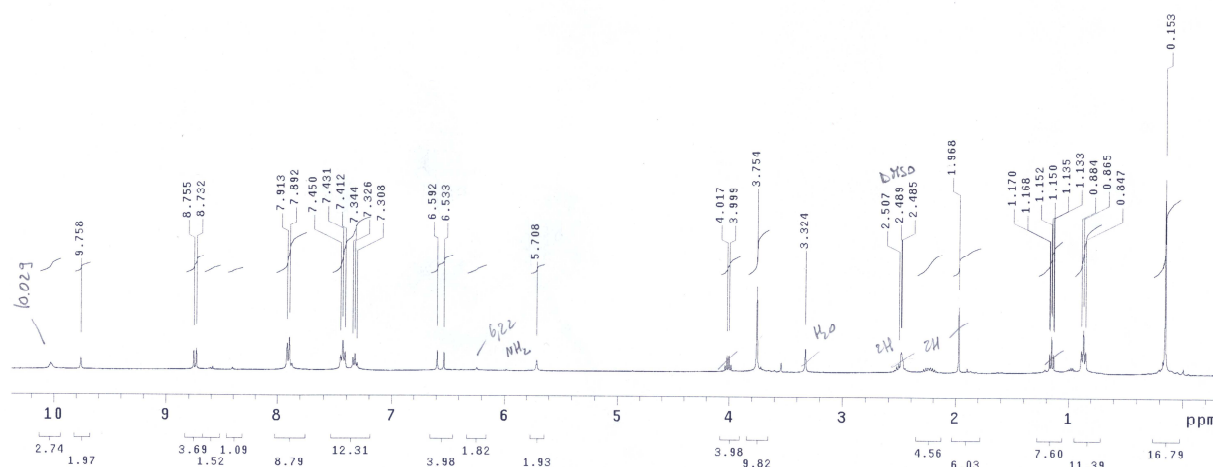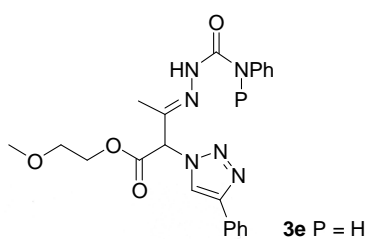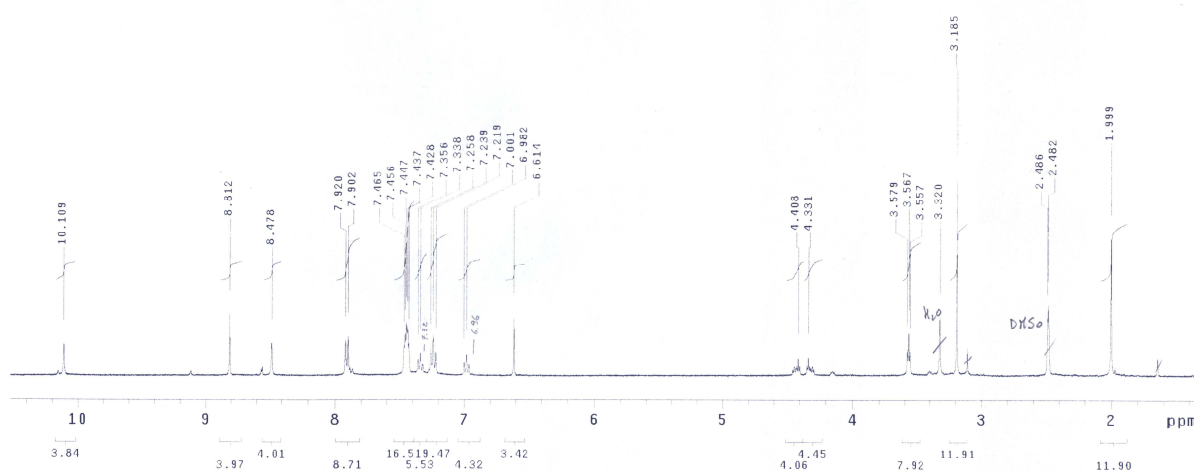



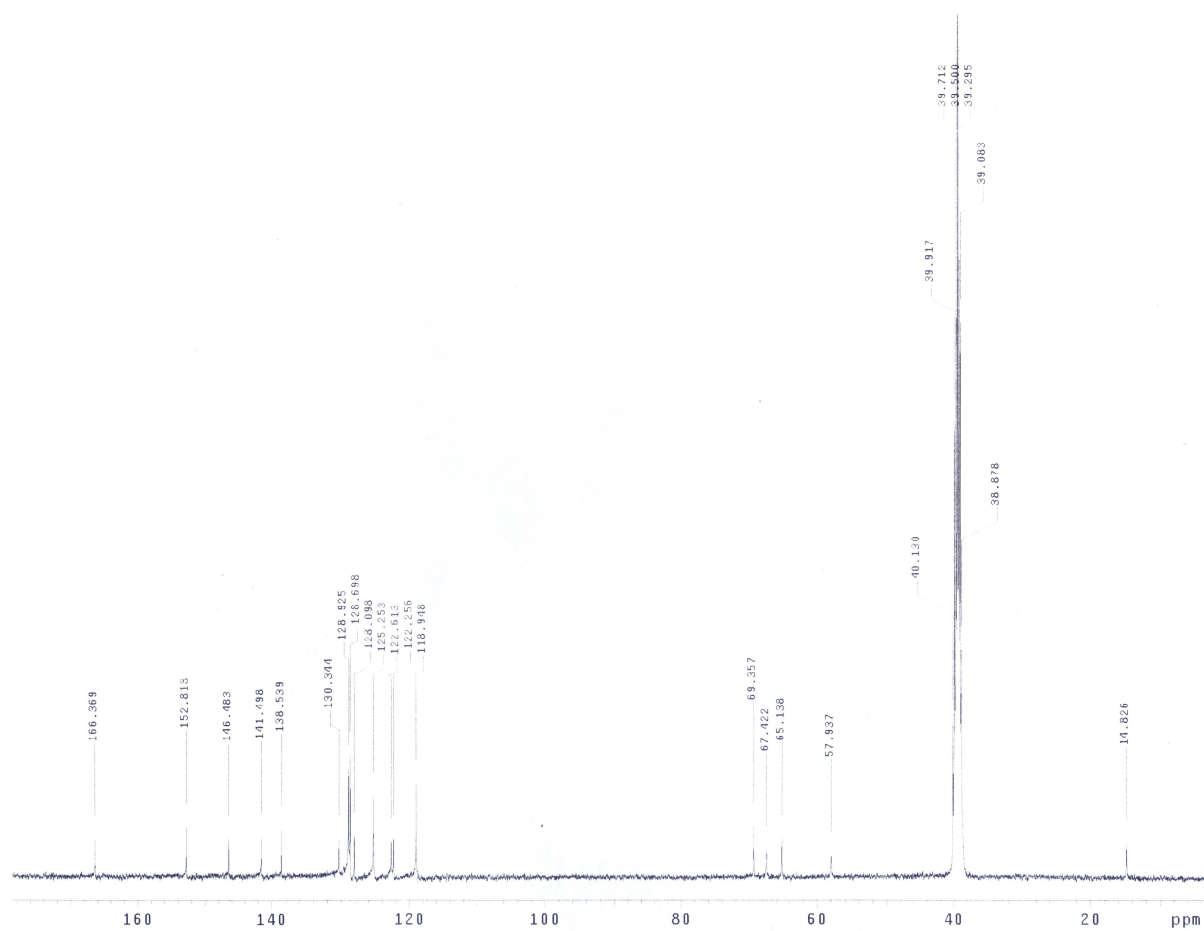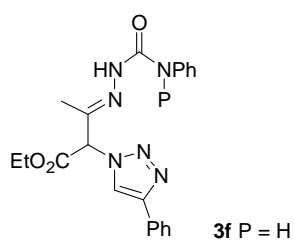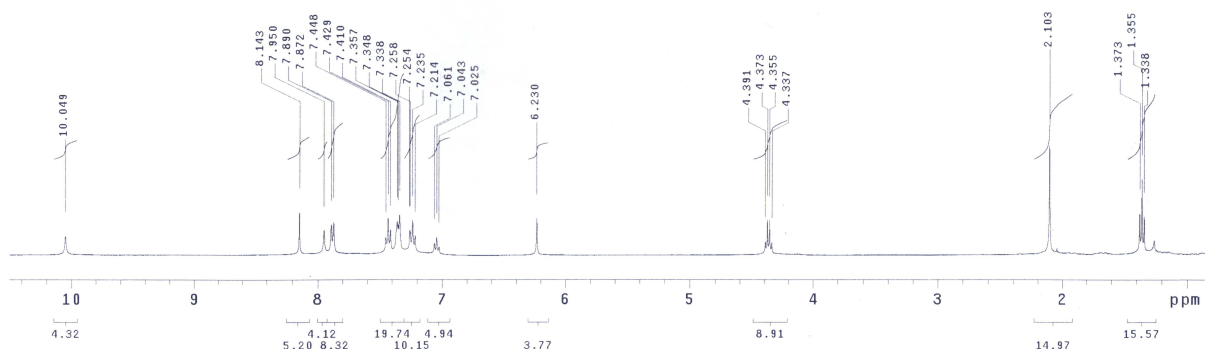

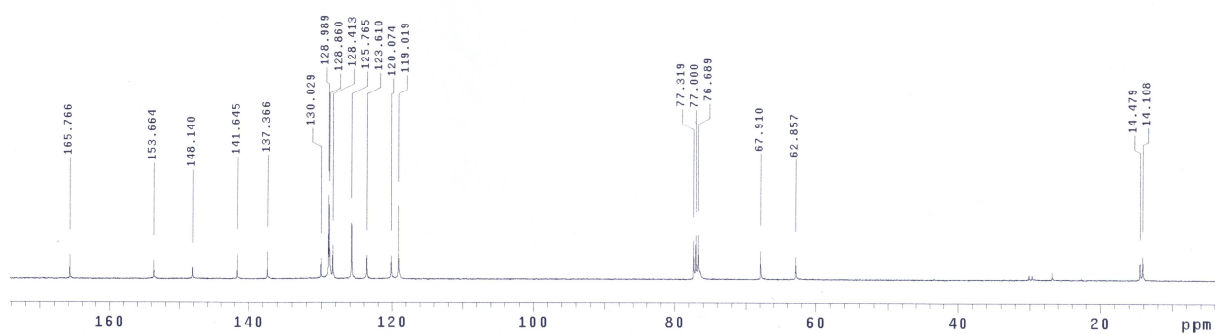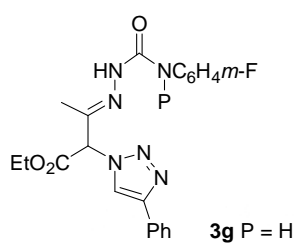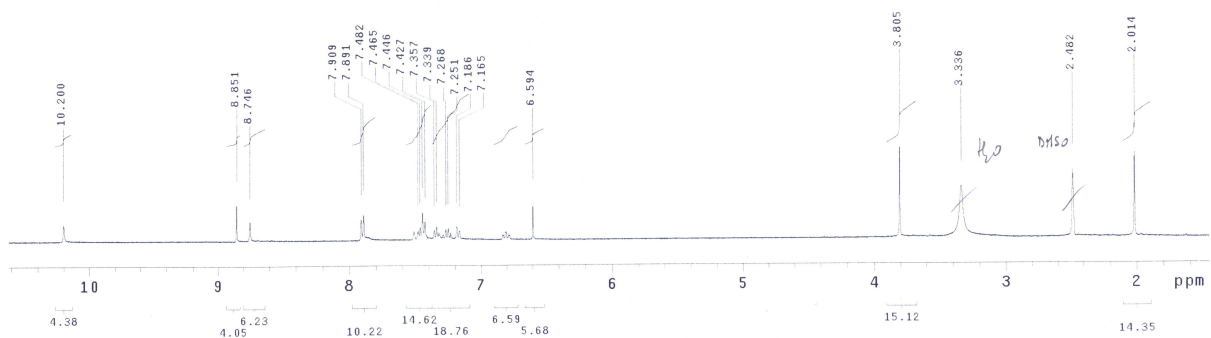

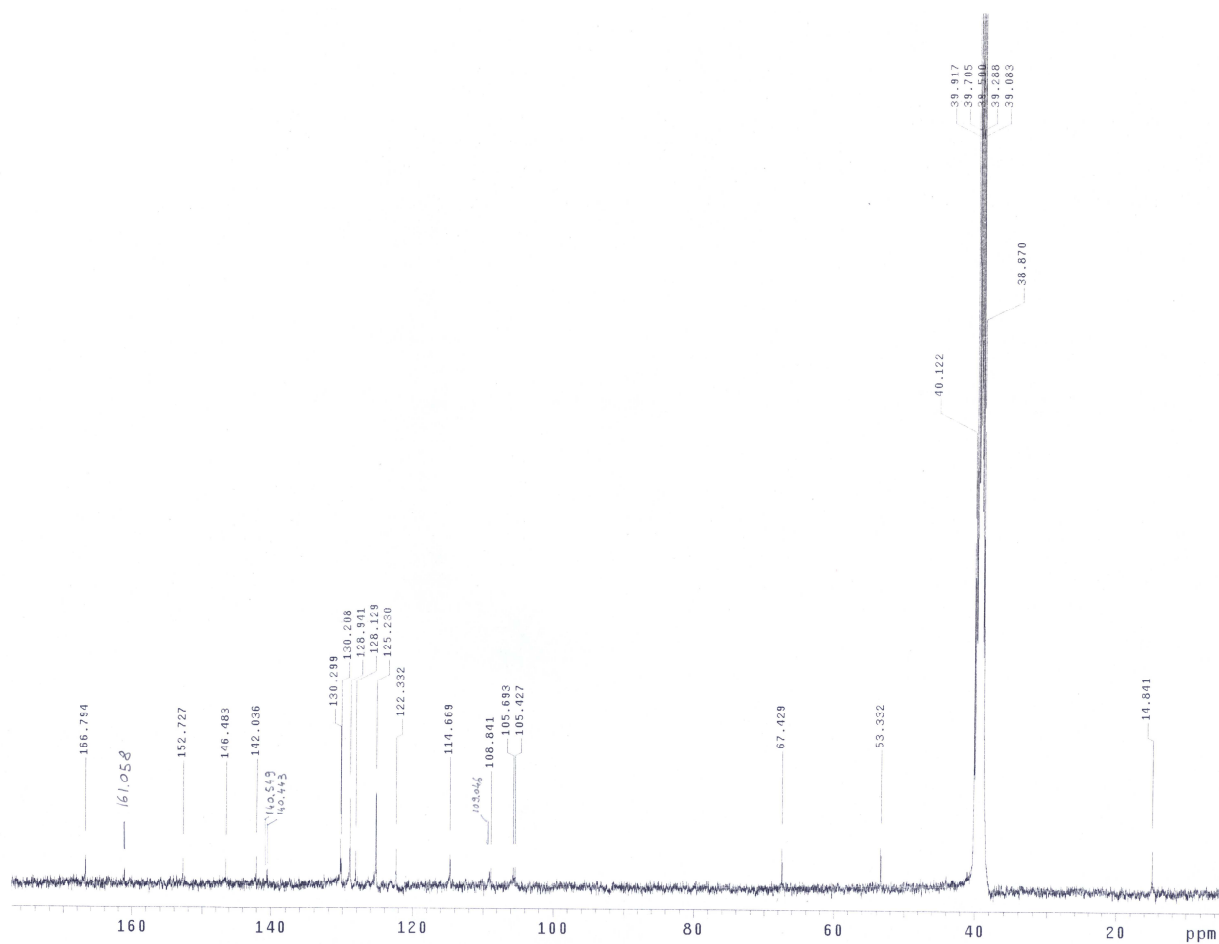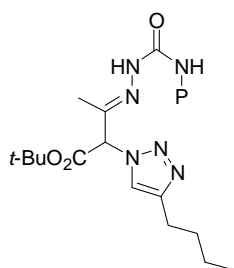

**3h** P = H  
**3h'** P = TMS

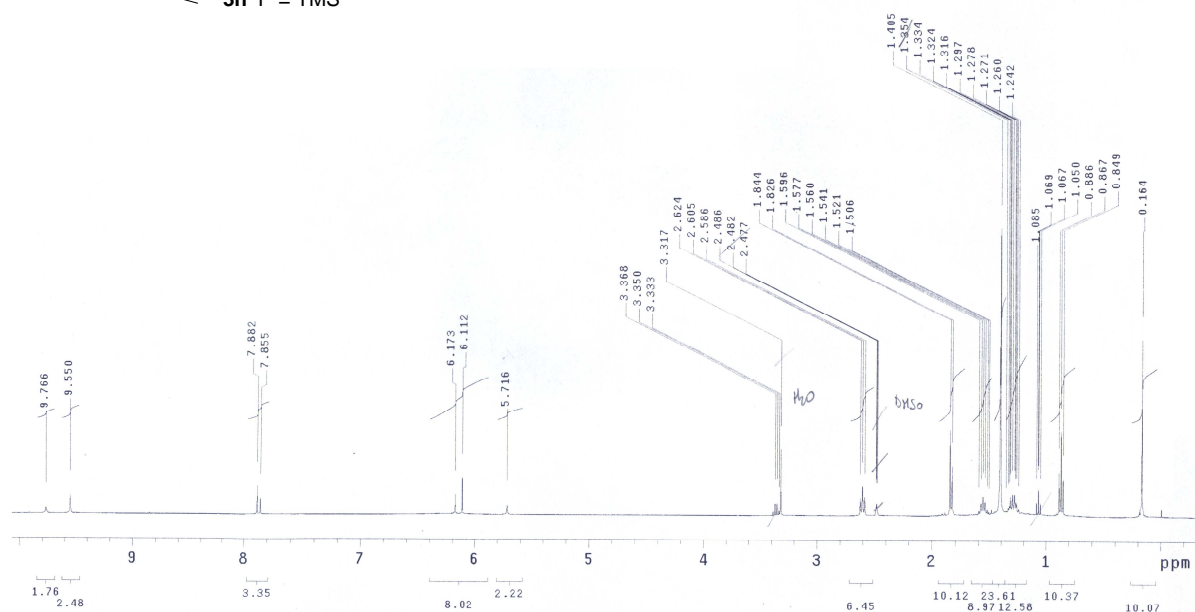

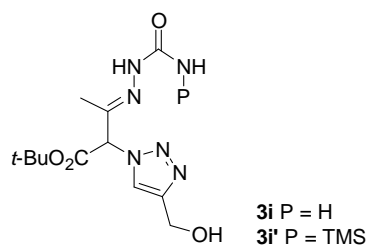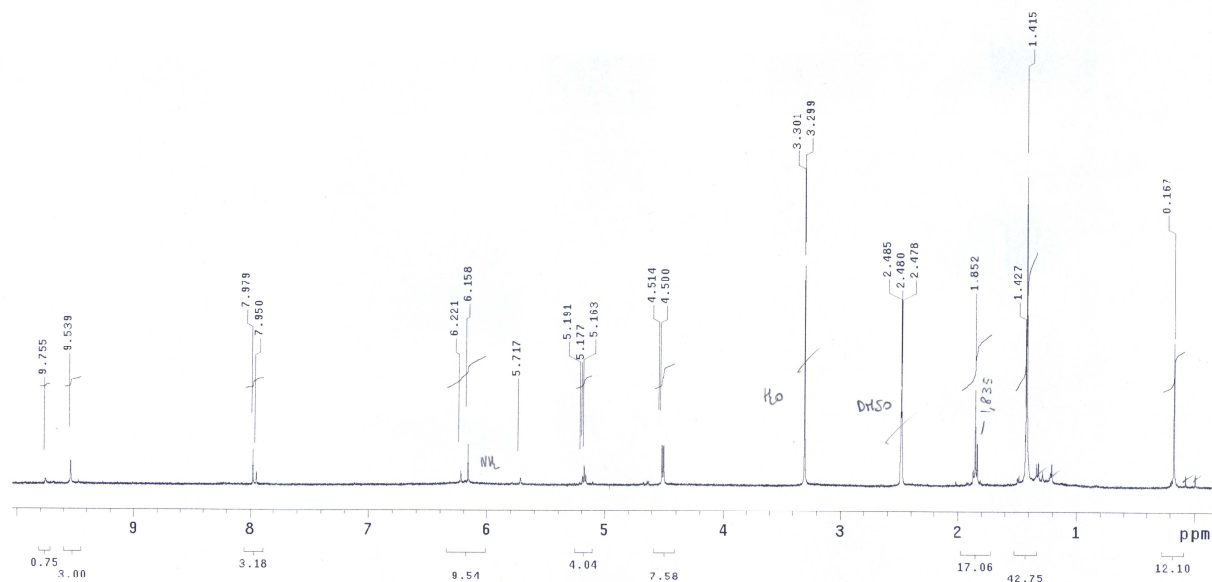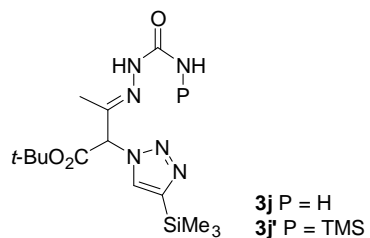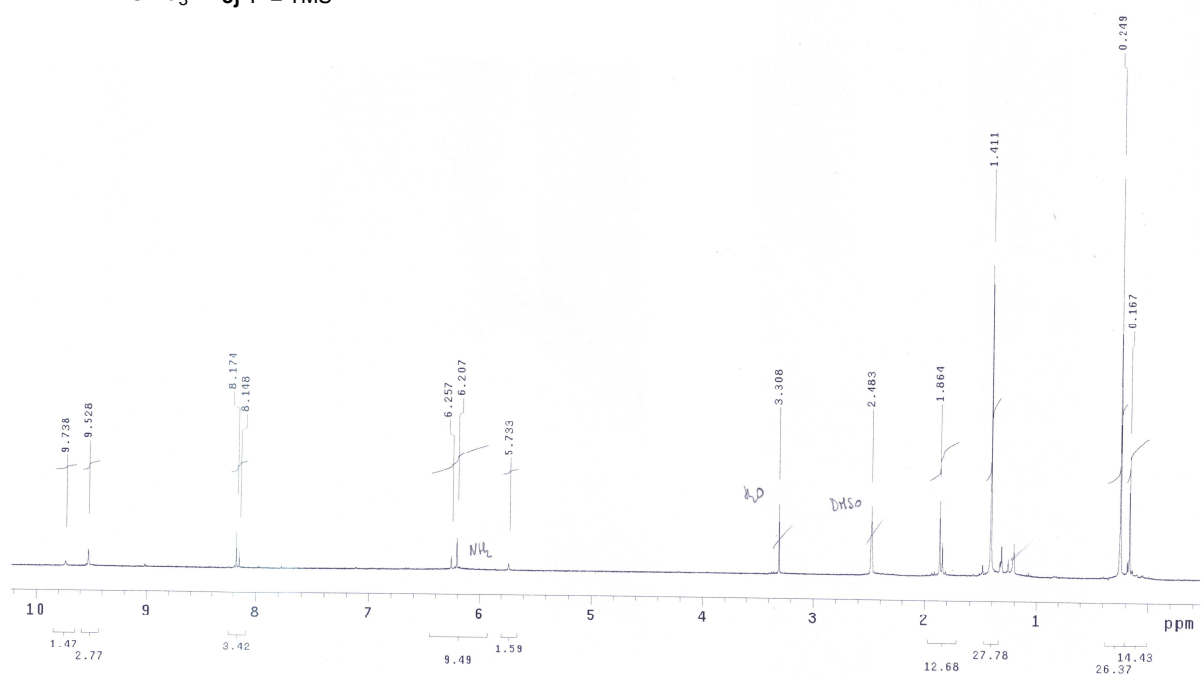

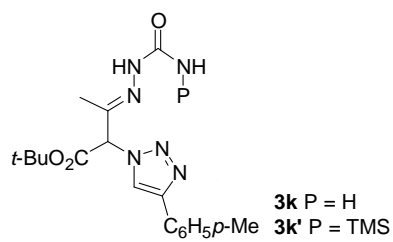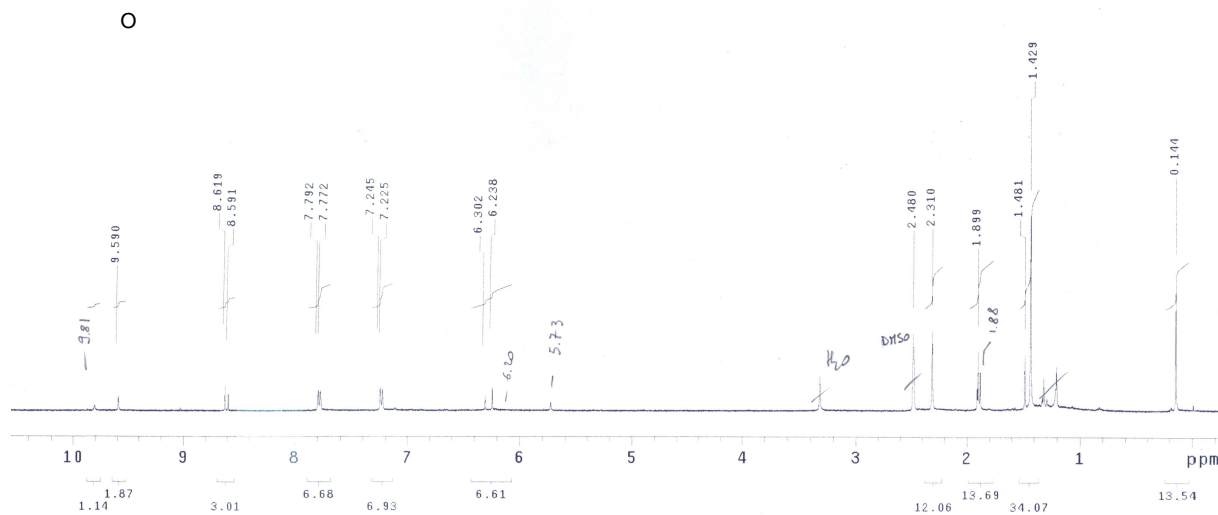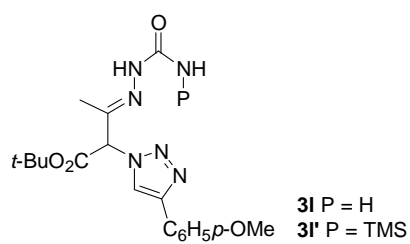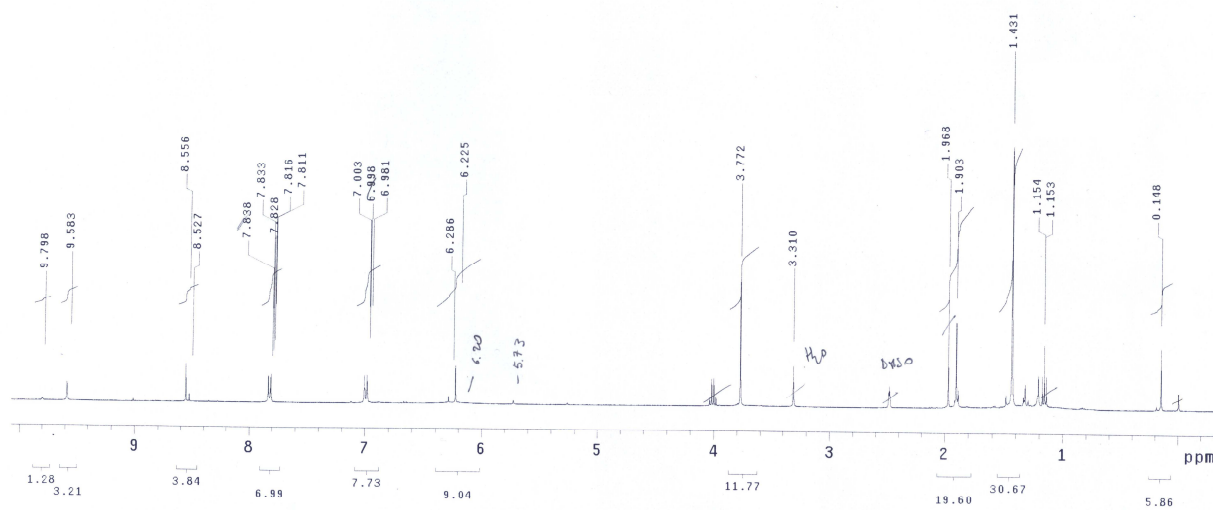

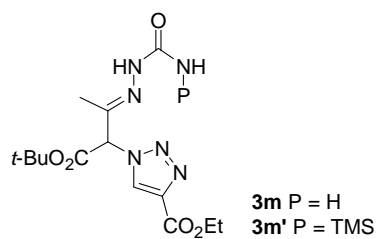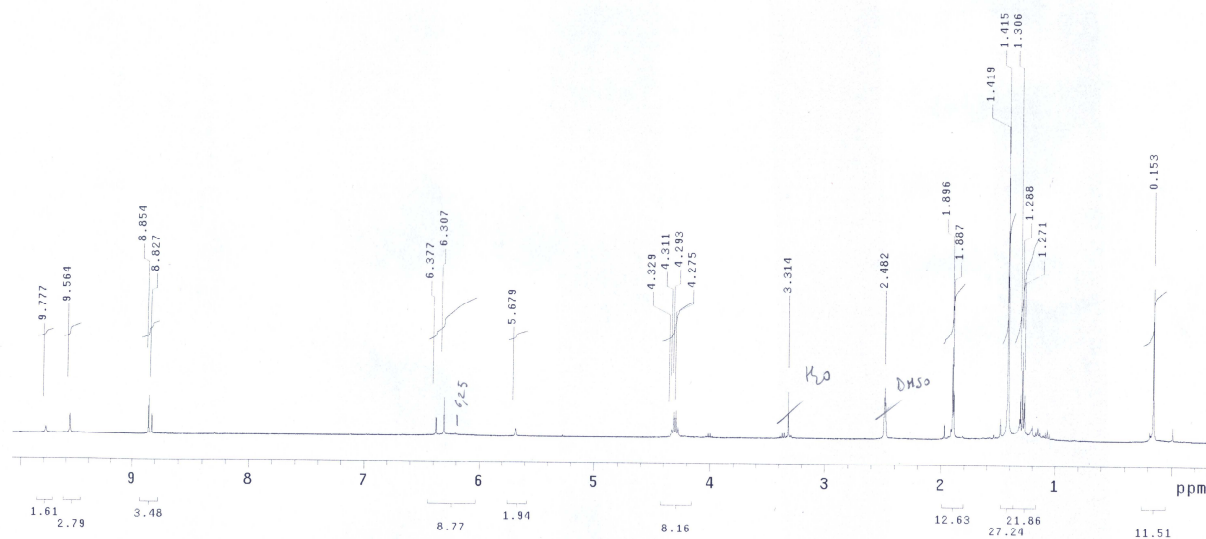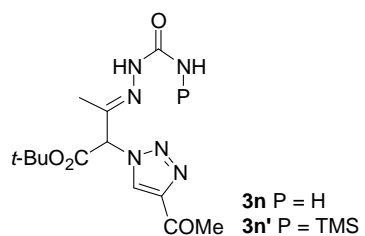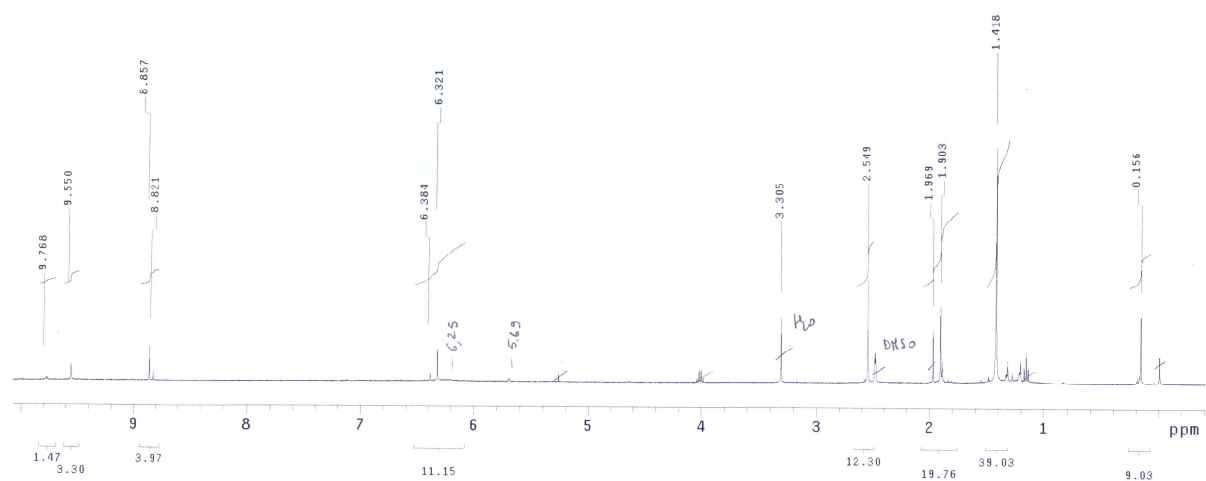

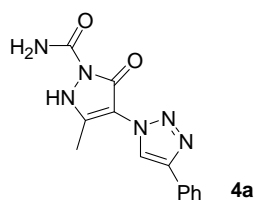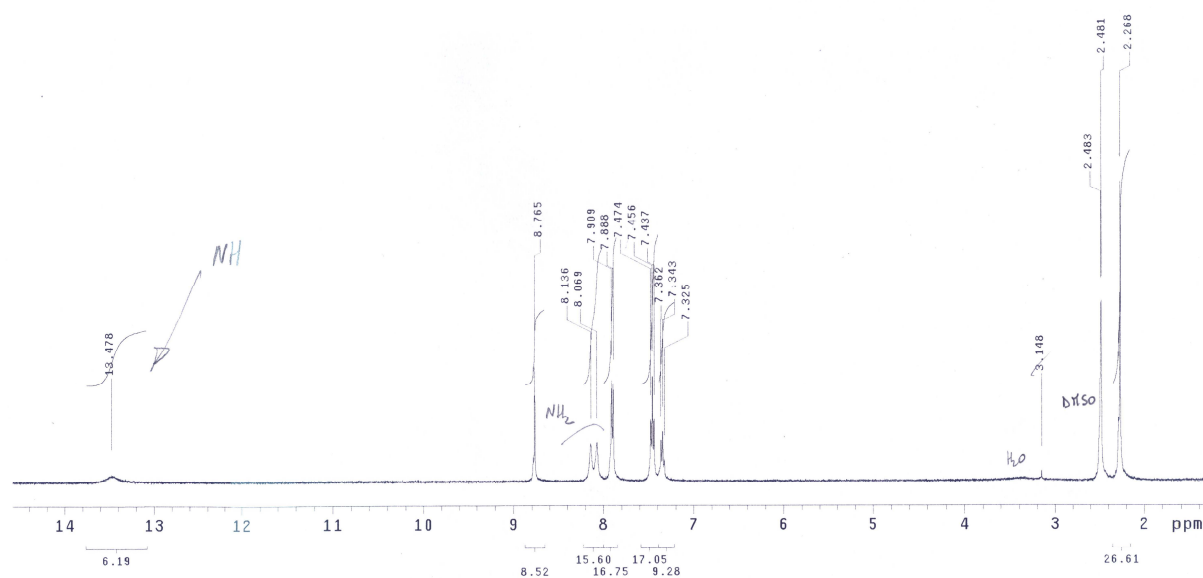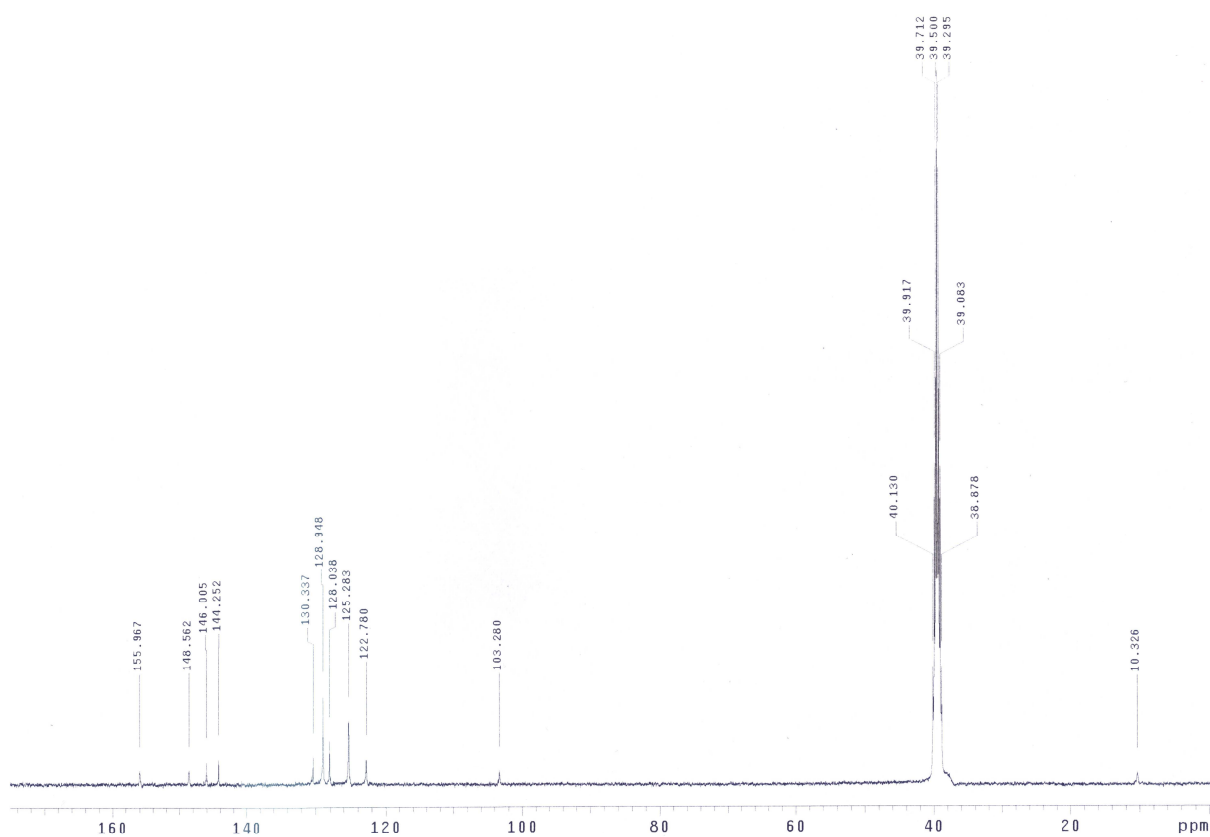

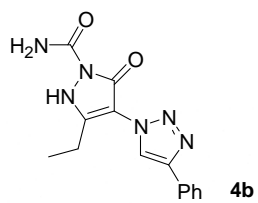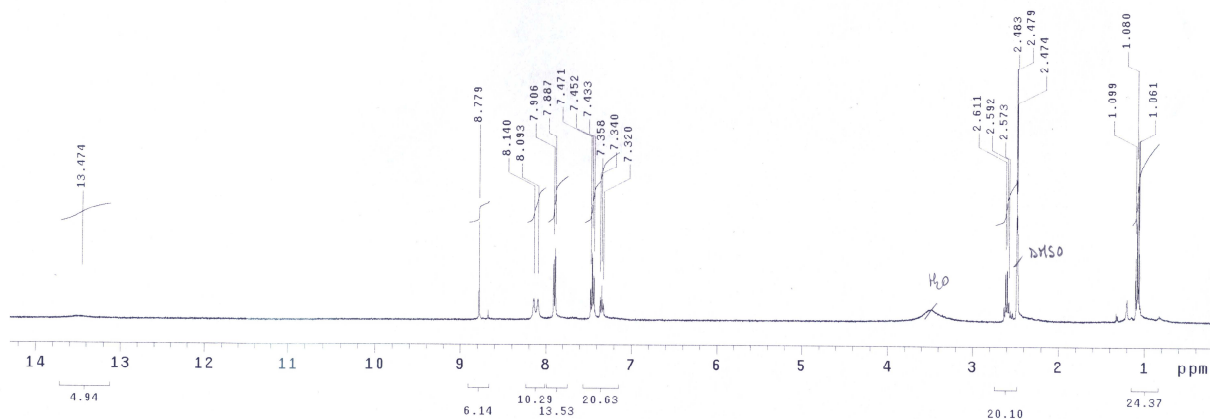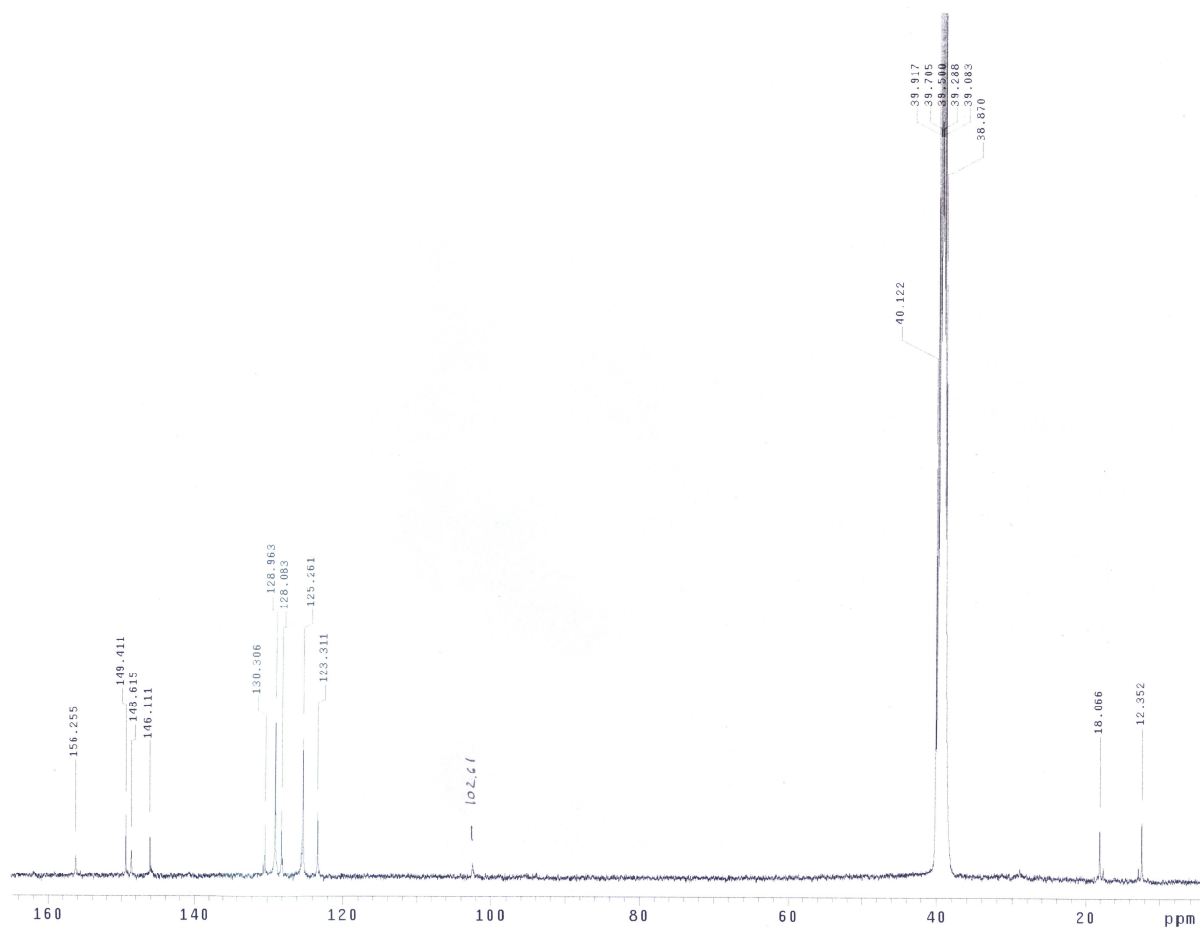



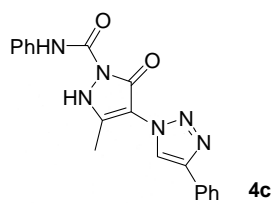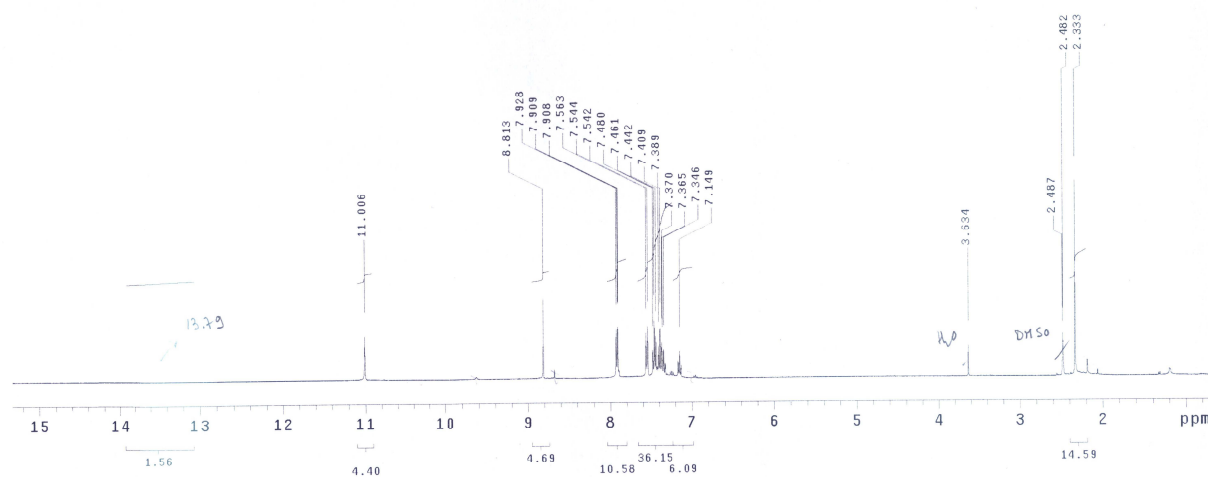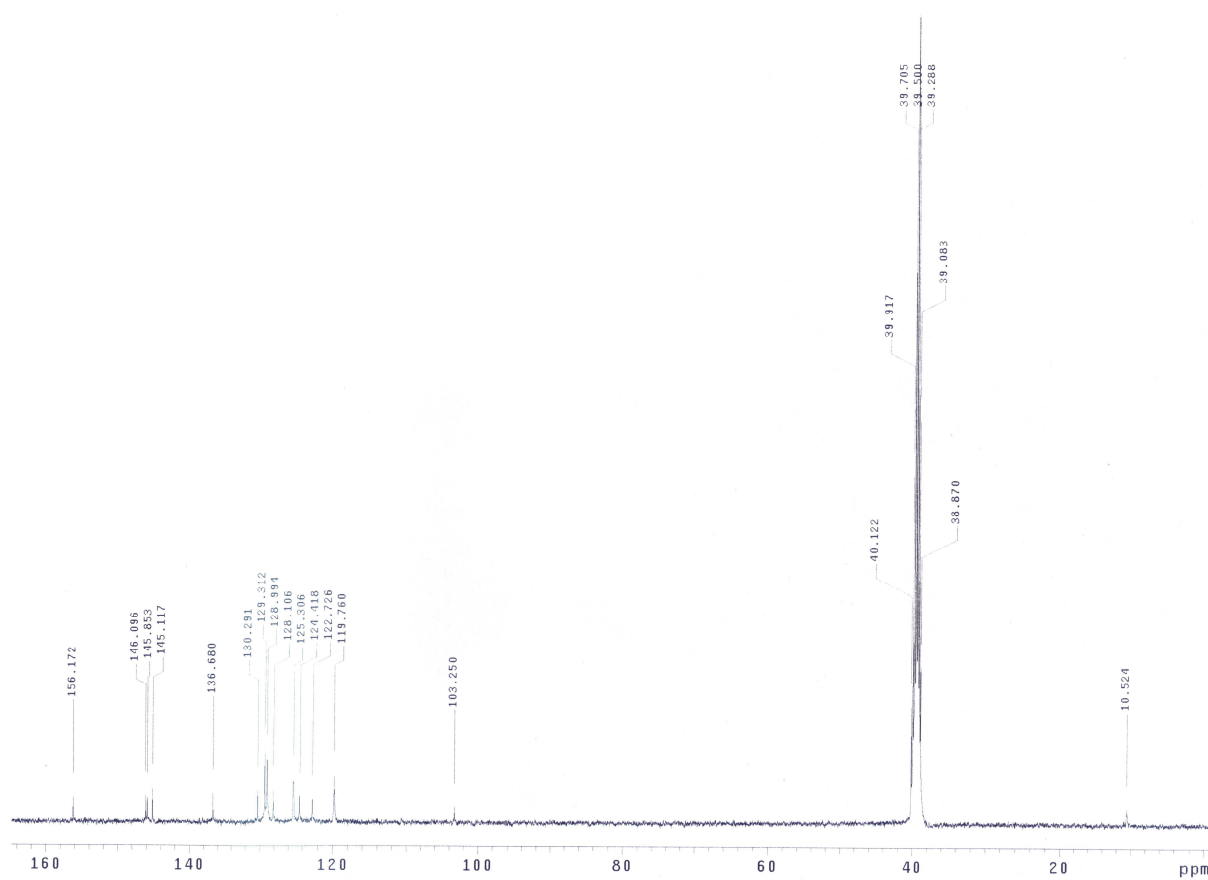

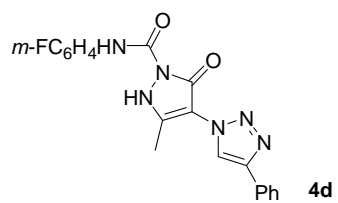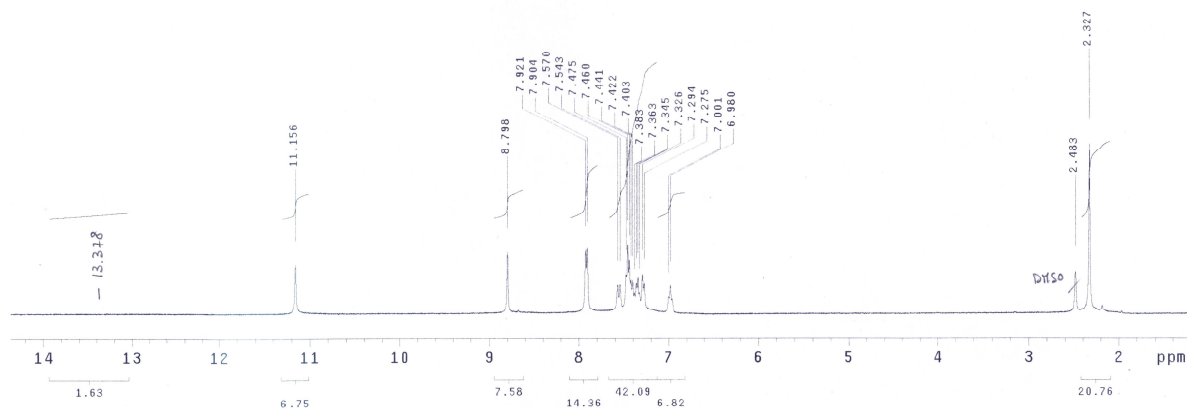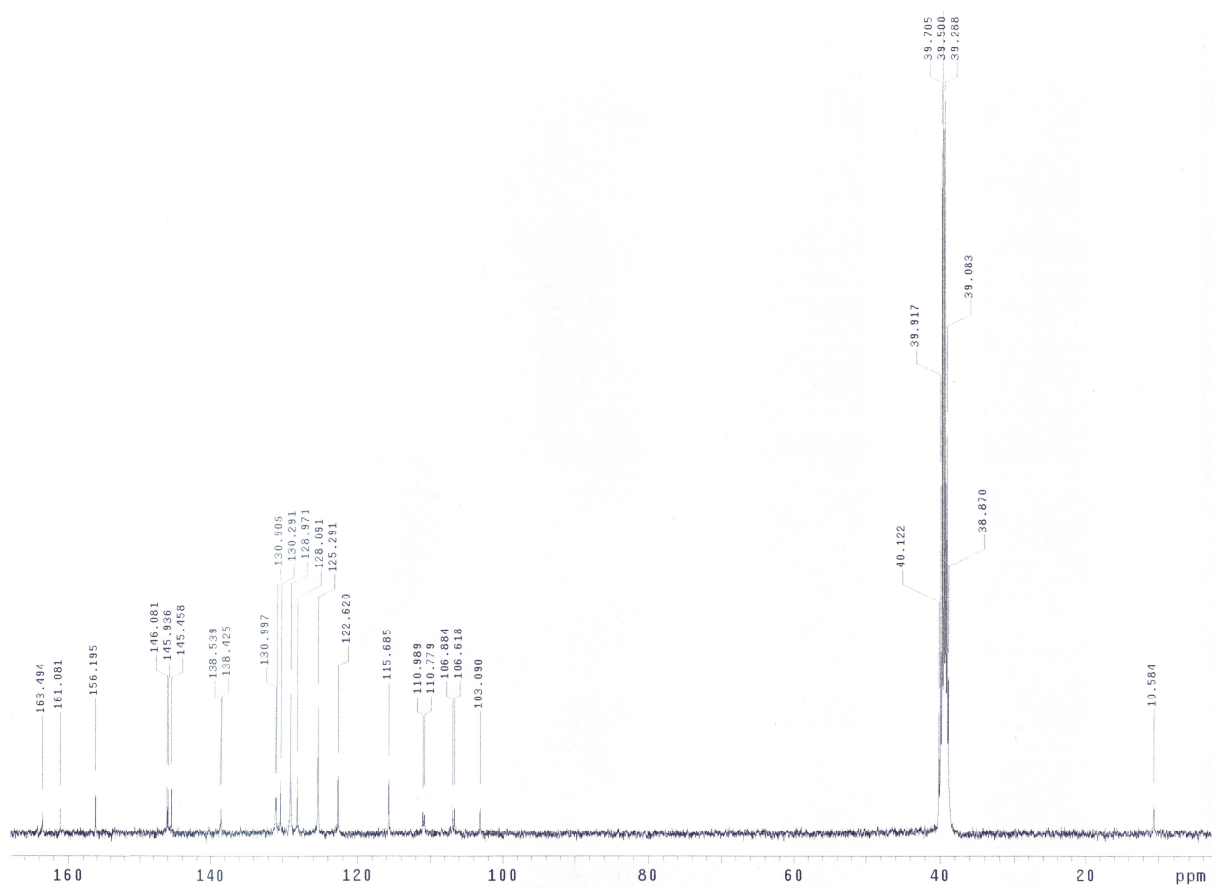

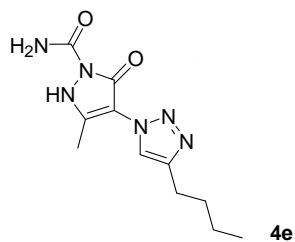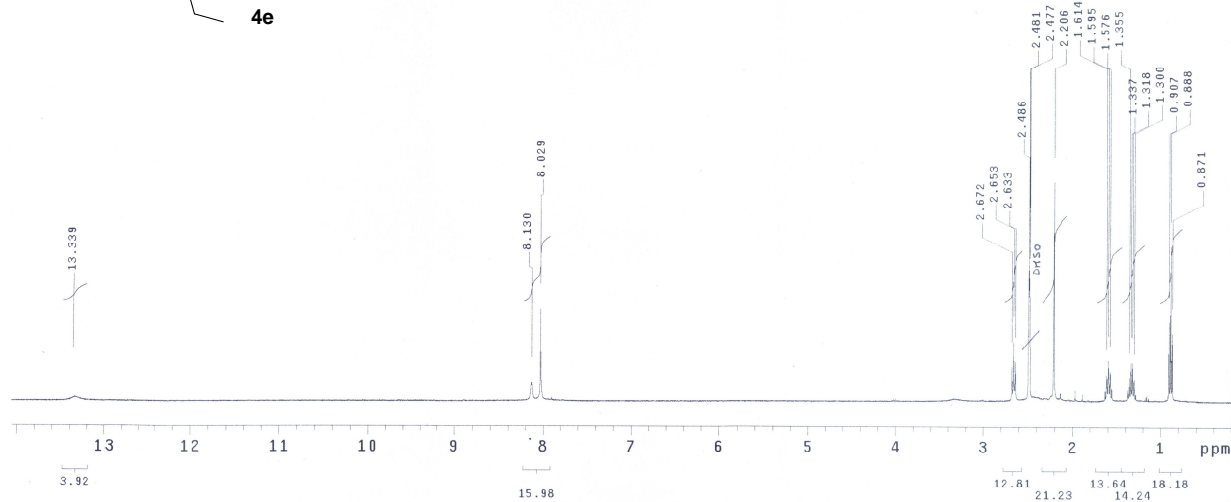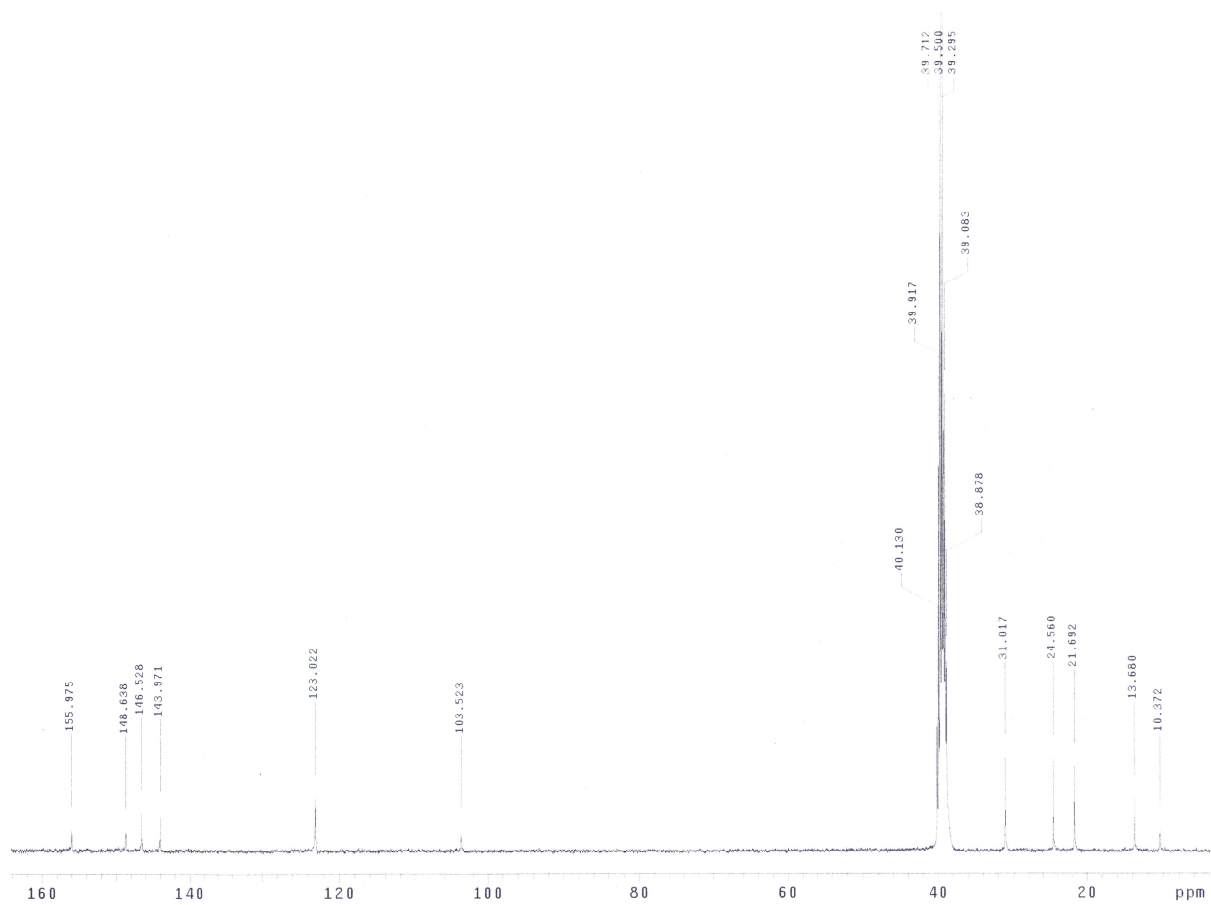

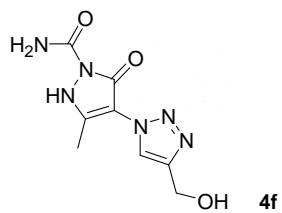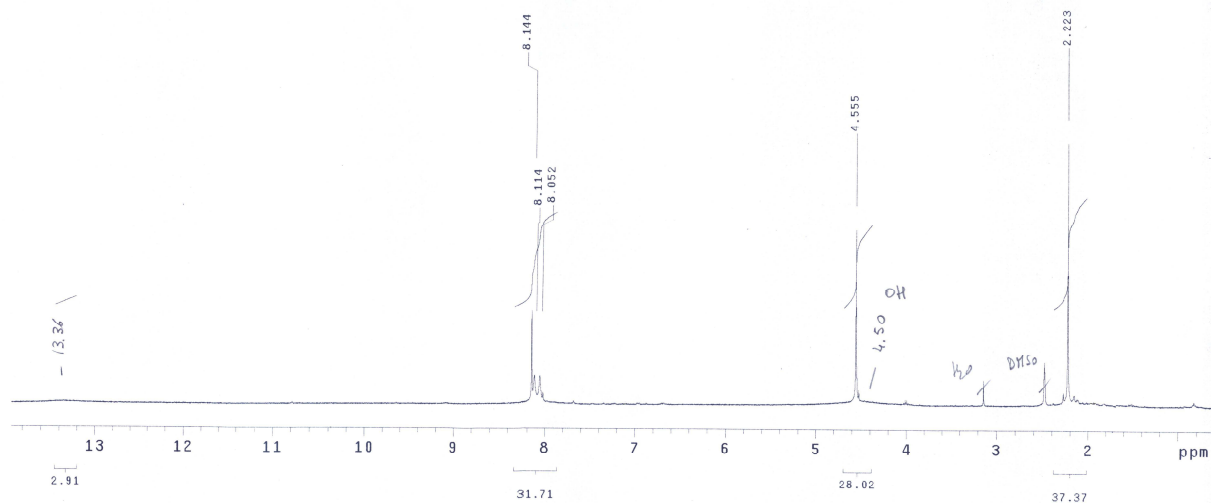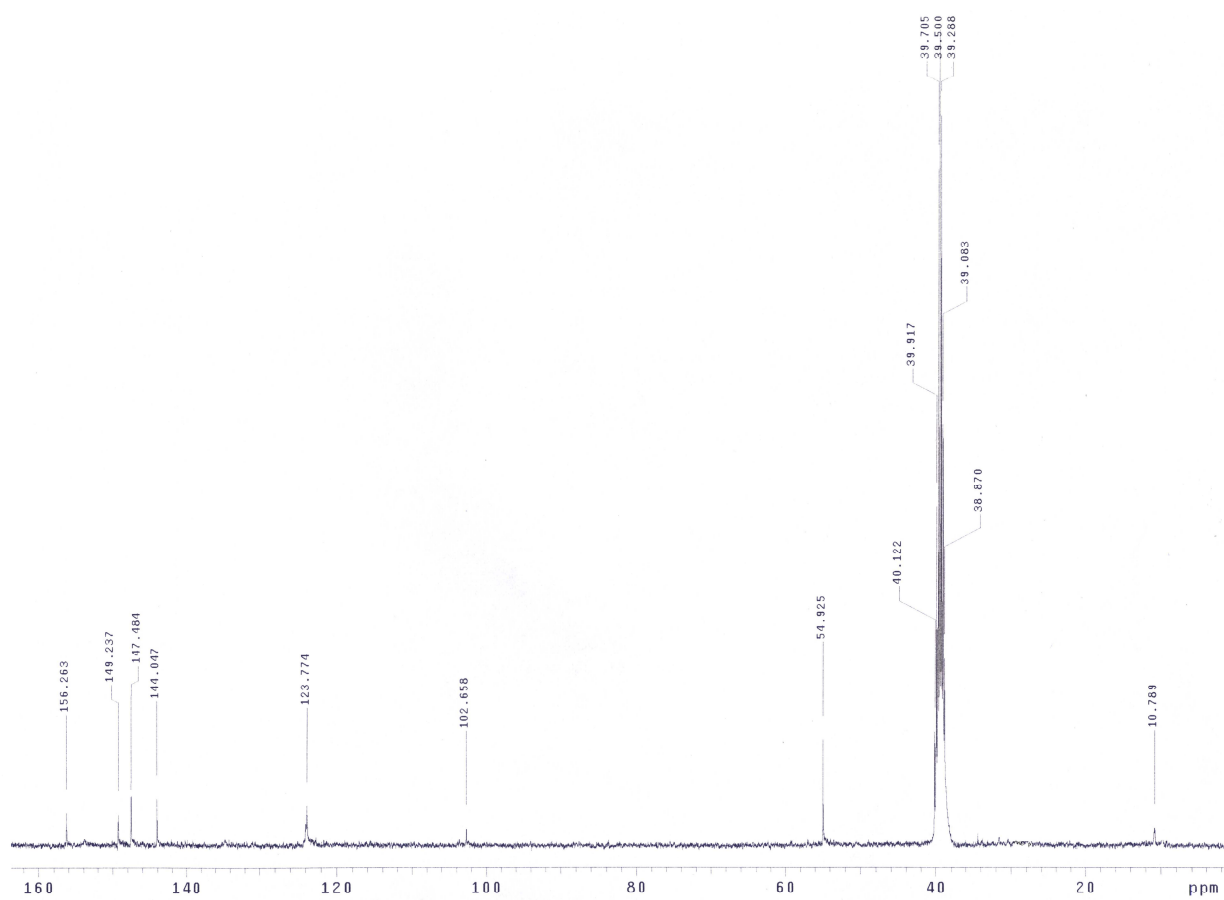

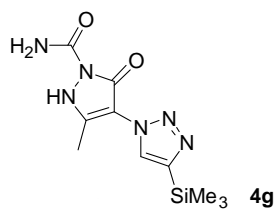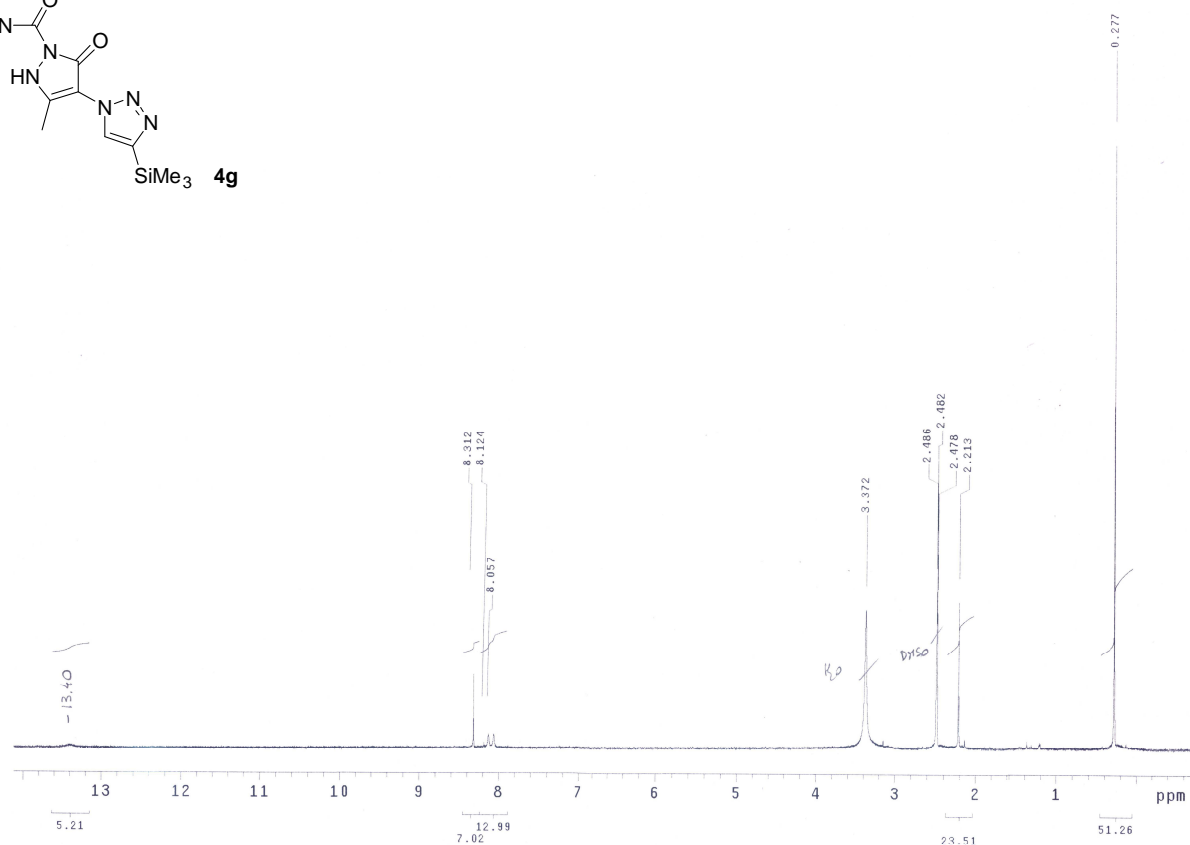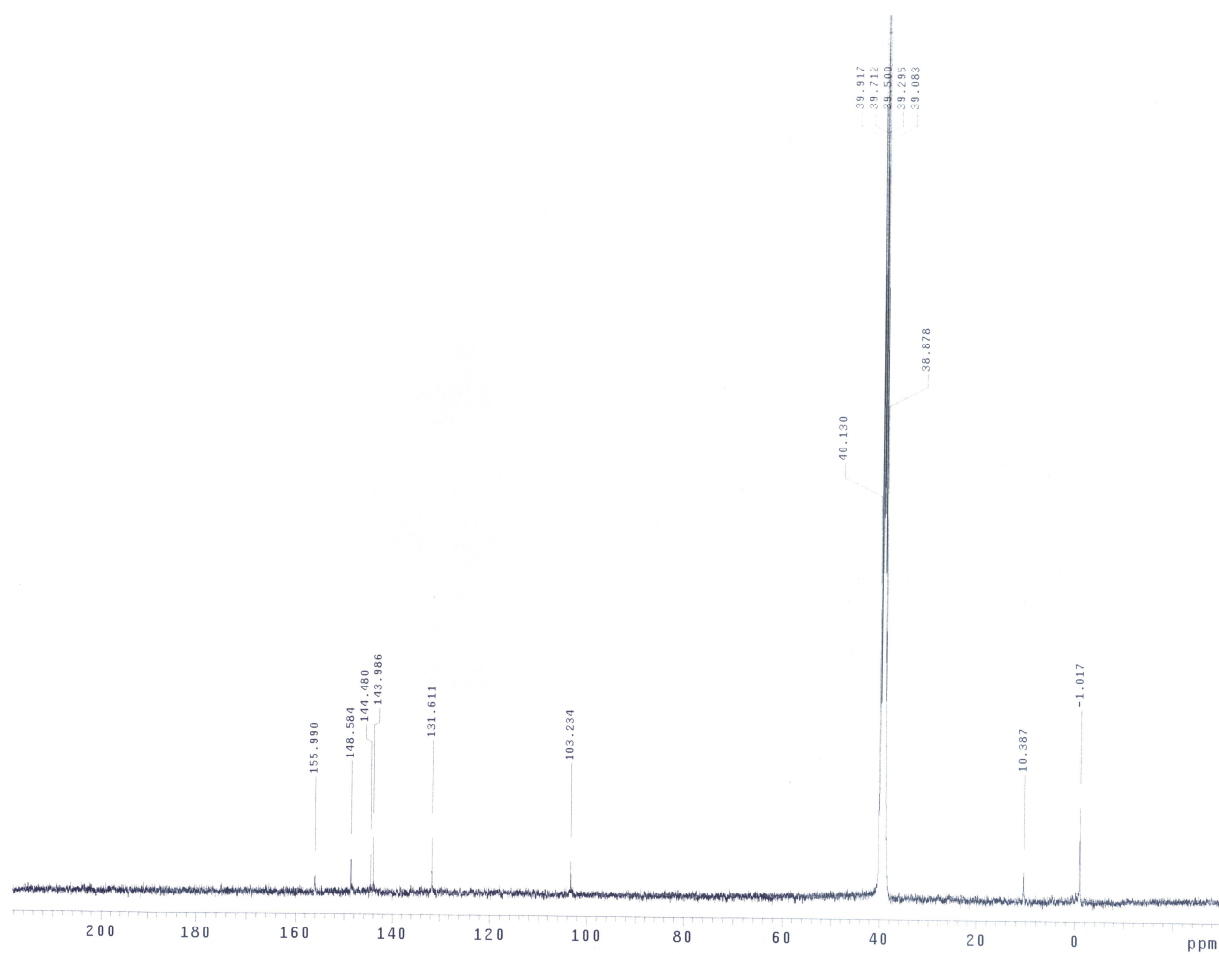

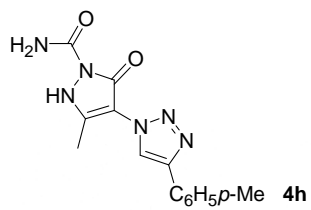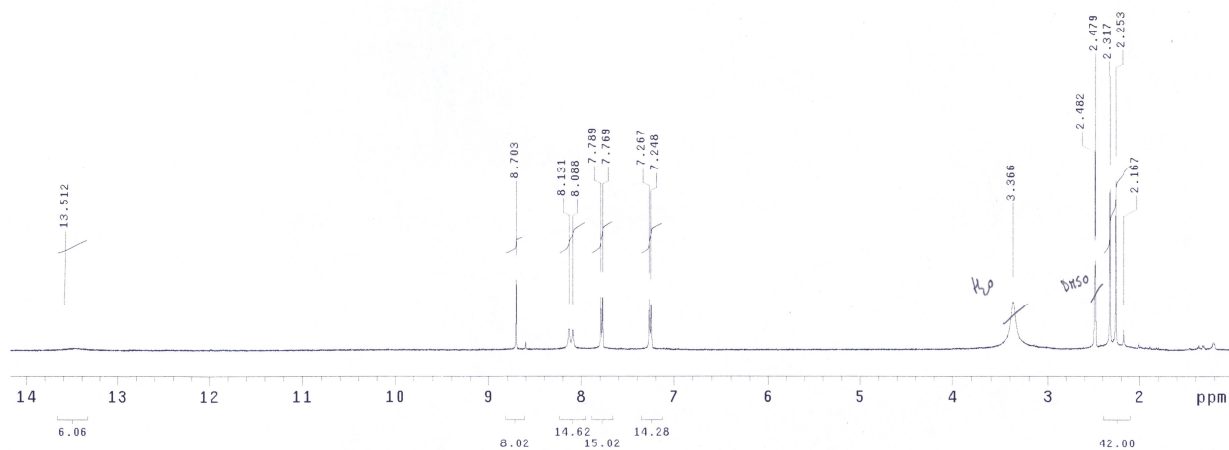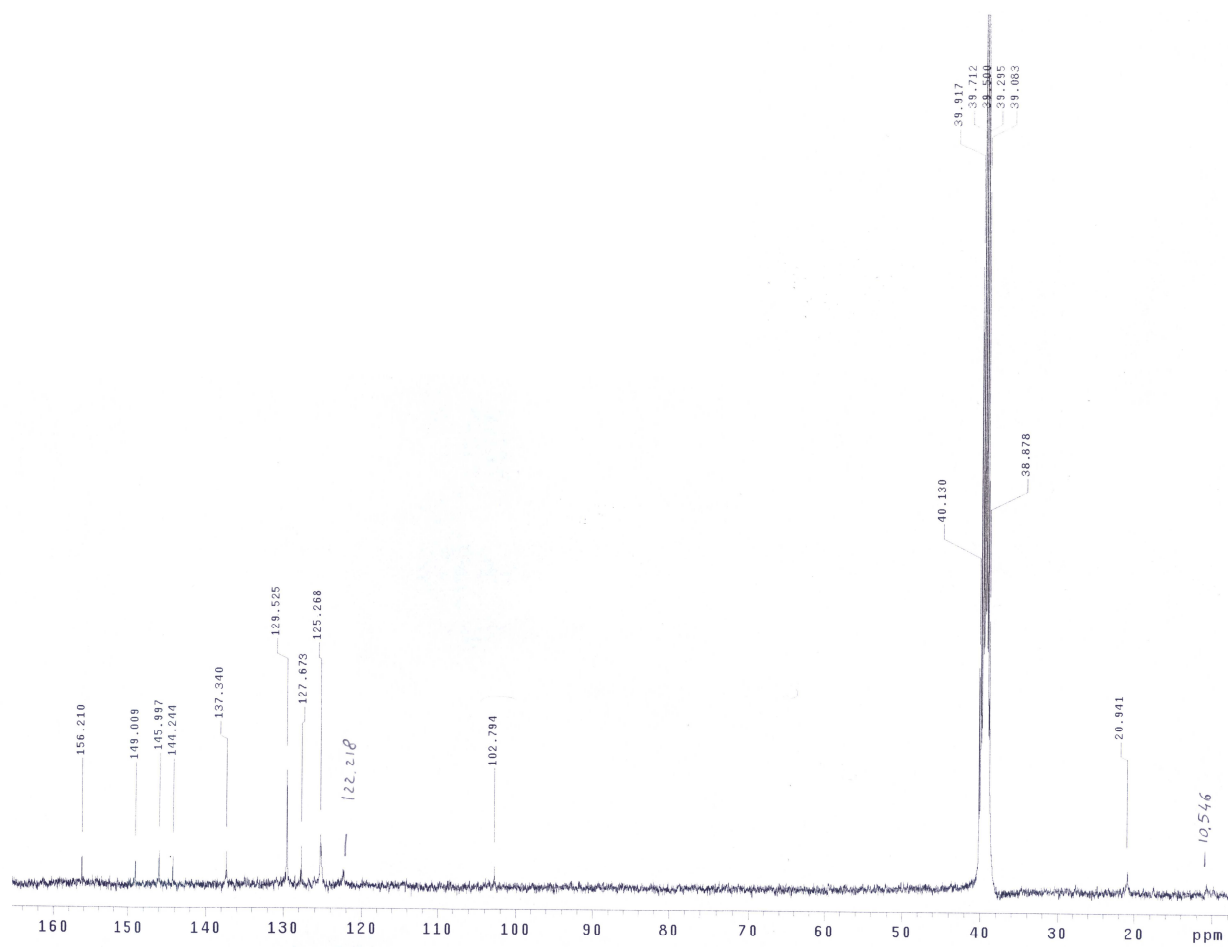

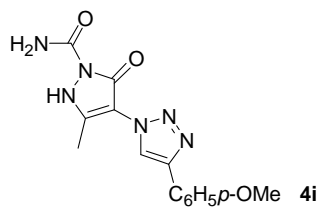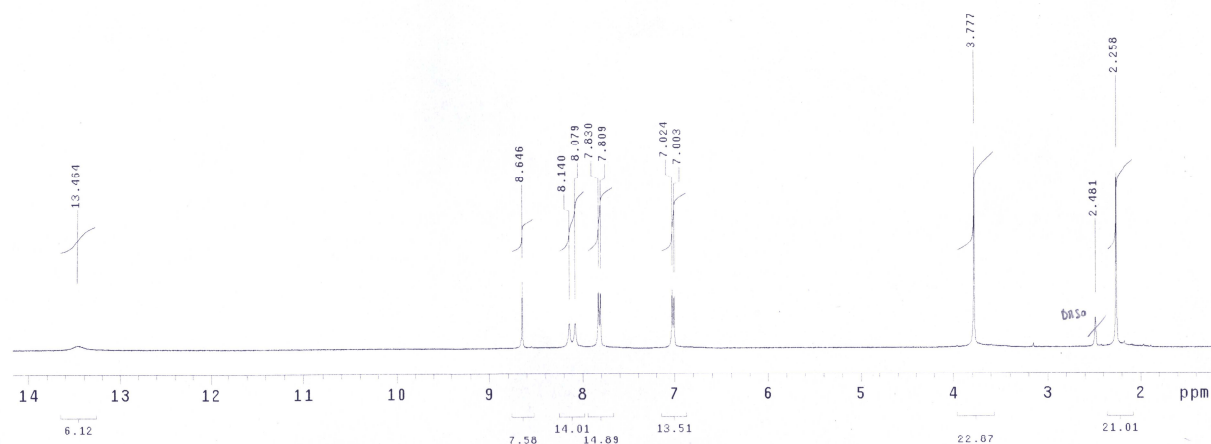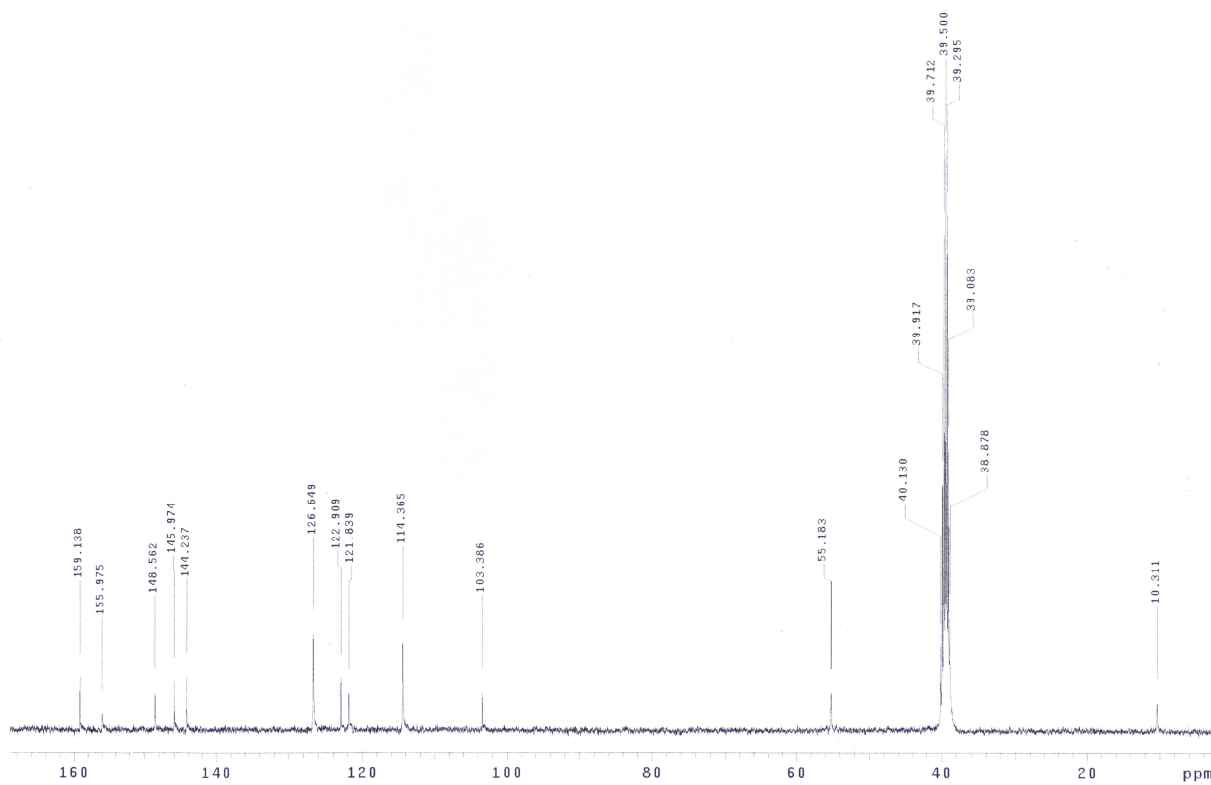

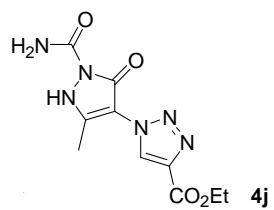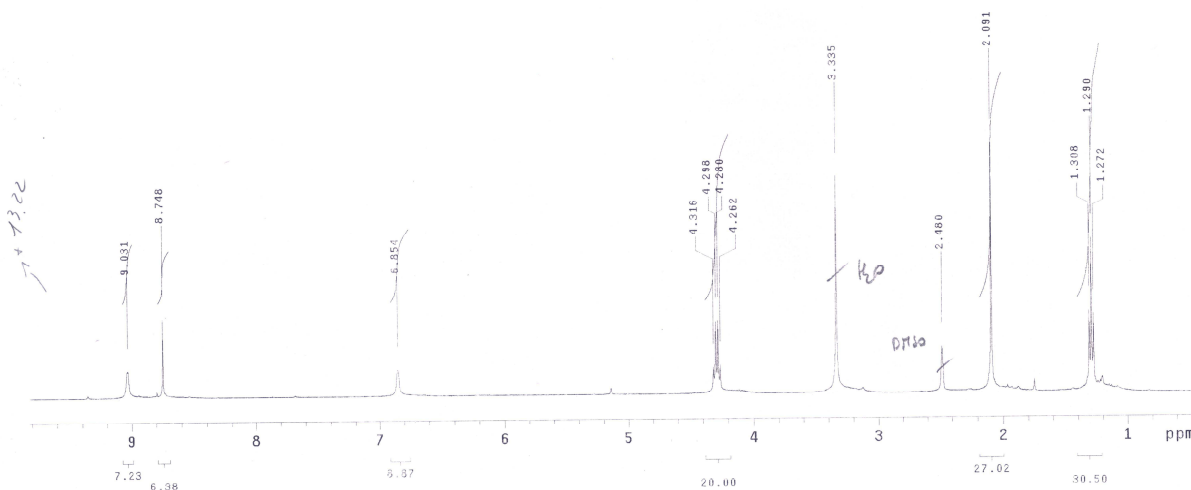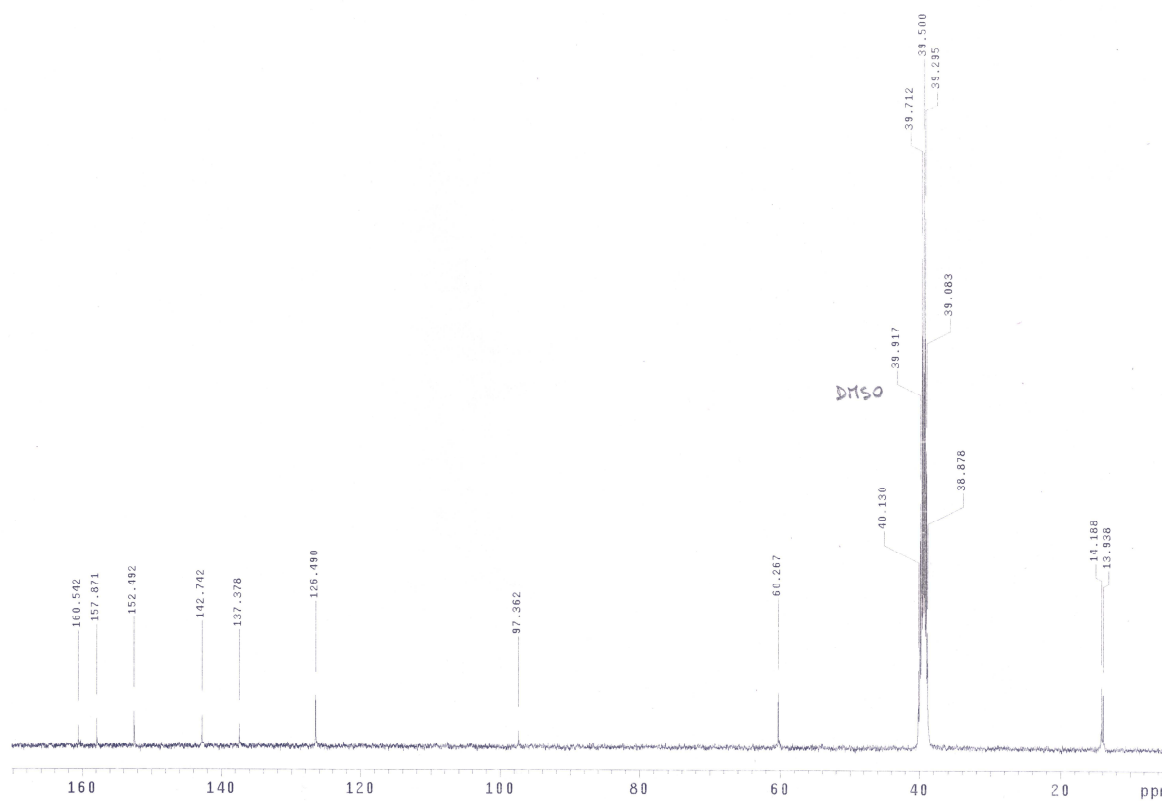



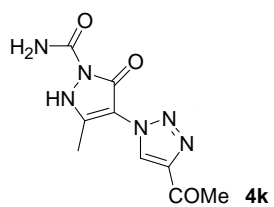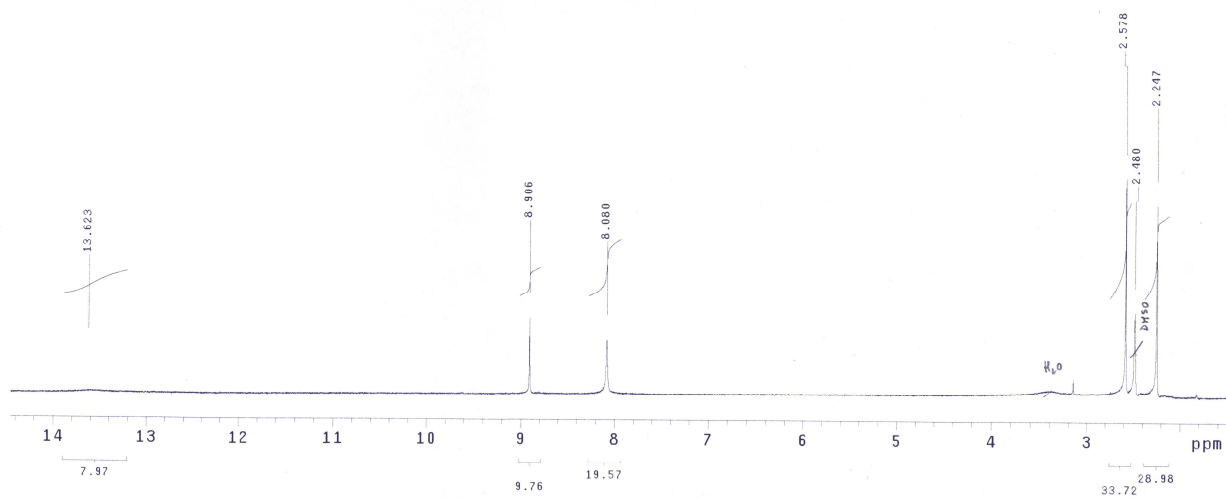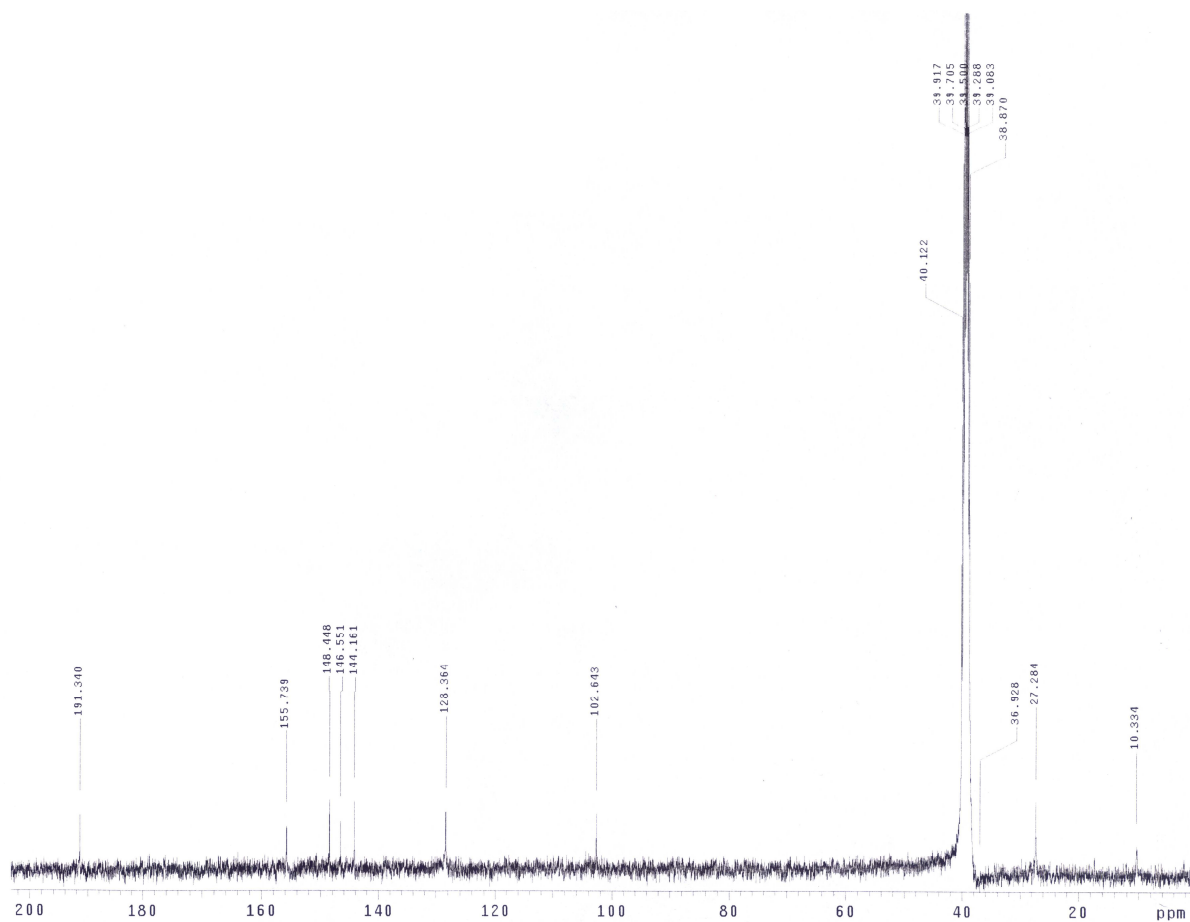

#### 4. References.

- (1) Sommer, S. *Tetrahedron Lett.* **1977**, 18, 117–120.
- (2) (a) Attanasi, O. A.; Filippone, P.; Mei, A.; Santeusanio, S. *Synthesis* **1984**, 671–672.
- (b) Attanasi, O. A.; Filippone, P.; Mei, A.; Santeusanio, S. *Synthesis* **1984**, 873–874.
